# Supplementary material for: Trilliumosides K and L, two novel steroidal saponins from rhizomes of Trillium govanianum, as potent anti-cancer agents targeting apoptosis in the A-549 cancer cell line
Source: PubMed Central journal article supplement (PMC10767554; doi:10.3389/fchem.2023.1306271), 2023-12-22
Supplement: DataSheet1.pdf [file DataSheet1.pdf]

## **Trilliumosides K-L, two novel steroidal saponins from rhizomes of *Trillium govanianum* as potent anticancer agents targeting apoptosis in A-549 cancer cell line.**

**Bashir Ahmad Lone<sup>1,2†</sup>, Misbah Tabassum<sup>1,3†</sup>, Anil Bhushan<sup>1,2</sup>, Dixhya Rani<sup>1,2</sup>, Urvashi Dhiman<sup>1,2</sup>, Ajaz Ahmad<sup>4</sup>, Hilal Ahmad Mir<sup>5</sup>, Prem N. Gupta<sup>1,3</sup>, D. M. Mondhe<sup>1,3</sup>, Sumeet Gairola<sup>1,6</sup> and Prasoon Gupta<sup>1,2\*</sup>**

<sup>1</sup>CSIR-Human Resource Development Centre, Academy of Scientific and Innovative Research, Ghaziabad, India, <sup>2</sup>Natural Products and Medicinal Chemistry Division, CSIR-Indian Institute of Integrative Medicine, Jammu, India, <sup>3</sup>Pharmacology Division, CSIR-Indian Institute of Integrative Medicine, Jammu, India, <sup>4</sup>Department of Clinical Pharmacy, College of Pharmacy, King Saud University, Riyadh 11451, Saudi Arabia, <sup>5</sup>Department of Ophthalmology, Pathology, and Cell Biology, Columbia University, New York, NY, United States, <sup>6</sup>Plant Science and Agrotechnology Division, CSIR-Indian Institute of Integrative Medicine, Jammu, India

### **Abstract**

Two novel steroidal saponins, trilliumosides K (**1**) and L (**2**) were isolated from the rhizomes of *Trillium govanianum* led by bioactivity-guided phytochemical investigation along with seven known compounds govanoside D (**3**) protodioscin (**4**), borassoside E (**5**), 20-hydroxyecdysone (**6**), 5,20-hydroxyecdysone (**7**), govanic acid (**8**) and diosgenin (**9**). The structure of novel compounds 1-2 were established using analysis of spectroscopic data including 1D, 2D NMR and HR-ESI-MS data. All isolated compounds were evaluated for in-vitro cytotoxic activity against a panel of human cancer cell lines. Compound (**1**) showed significant cytotoxic activity against A-549 (Lung) and SW-620 (Colon) cancer cell lines with IC<sub>50</sub> values of 1.83 & 1.85  $\mu$ M, whereas compound (**2**) IC<sub>50</sub> value against A-549 cell line was found to be 1.79  $\mu$ M respectively. Among previously known compounds (**3**), (**5**) and (**9**) their cytotoxic IC<sub>50</sub> value was found to be in the range of 5-10  $\mu$ M. Comprehensive anticancer investigation revealed that compound (**2**) inhibited in-vitro migration and colony forming capability in the A-549 cell line. Additionally, the mechanistic analysis of compound (**2**) on the A-549 cell line indicated distinctive alterations in nuclear morphology, increased reactive oxygen species (ROS) production, and decreased levels of mitochondrial membrane potential (MMP). By upregulating the pro-apoptotic protein BAX and downregulating the anti-apoptotic protein BCL-2, the aforementioned actions eventually cause apoptosis, a

crucial hallmark in cancer research, which activates Caspase-3. To the best of our knowledge, this study reports the first mechanistic anticancer evaluation of the compounds isolated from the rhizomes of *Trillium govanianum* with remarkable cytotoxic activity in the desired micromolar range.

**Keywords:** *Trillium govanianum*, Saponins, Steroidal glycosides, A-549, BAX, BCL-2, cytotoxicity.

**Figure S1.** <sup>1</sup>HNMR spectrum of compound **1** (TG-07 B3) (MeOD<sub>6</sub>, 500 MHz)

**Figure S2.** <sup>13</sup>C NMR spectrum of compound **1** (MeOD<sub>6</sub>, 100 MHz)

**Figure S3.** DEPT spectrum of compound **1** (MeOD<sub>6</sub>, 100 MHz)

**Figure S4.** HSQC spectrum of compound **1**

**Figure S5.** HMBC spectrum of compound **1**

**Figure S6.** COSY spectrum of compound **1**

**Figure S7.** NOESY spectrum of compound **1**

**Figure S8.** ESI-MS spectrum of compound **1**

**Figure S9.** GC/MS analysis of compound **1**

**Figure S10.** <sup>1</sup>HNMR spectrum of compound **2** (TG-09) (MeOD<sub>6</sub>, 500 MHz)

**Figure S11.** <sup>13</sup>C NMR spectrum of compound **2** (CD<sub>3</sub>OD, 500 MHz)

**Figure S12.** DEPT spectrum of compound **2** (CD<sub>3</sub>OD<sub>6</sub>, 500 MHz)

**Figure S13.** HSQC spectrum of compound **2**

**Figure S14.** HMBC spectrum of compound **2**

**Figure S15.** COSY spectrum of compound **2**

**Figure S16.** NOESY spectrum of compound **2**

**Figure S17.** HR-ESIMS spectrum of compound **2**

**Figure S18.** GC/MS analysis of compound **2**

**Figure S19.** <sup>1</sup>HNMR spectrum of compound **3** (TG-12) (CD<sub>3</sub>OD, 500 MHz)

**Figure S20.** <sup>13</sup>C NMR spectrum of compound **3** (CD<sub>3</sub>OD, 100 MHz)

**Figure S21.** <sup>1</sup>HNMR spectrum of compound **4** (TG-04) (CD<sub>3</sub>OD, 500 MHz)

**Figure S22.** <sup>13</sup>C NMR spectrum of compound **4** (CD<sub>3</sub>OD, 100 MHz)

**Figure S23.** <sup>1</sup>HNMR spectrum of compound **5** (TG-08) (CD<sub>3</sub>OD, 500 MHz)

**Figure S24.**  $^{13}\text{C}$  NMR spectrum of compound **5** ( $\text{CD}_3\text{OD}$ , 100 MHz)

**Figure S25.**  $^1\text{H}$ NMR spectrum of compound **6 (TG-01)** ( $\text{CD}_3\text{OD}$ , 500 MHz)

**Figure S26.**  $^{13}\text{C}$  NMR spectrum of compound **6** ( $\text{CD}_3\text{OD}$ , 100 MHz)

**Figure S27.**  $^1\text{H}$ NMR spectrum of compound **7 (TG-02)** ( $\text{CDCl}_3$ , 500 MHz)

**Figure S28.**  $^{13}\text{C}$  NMR spectrum of compound **7** ( $\text{CDCl}_3$ , 100 MHz)

**Figure S29.**  $^1\text{H}$ NMR spectrum of compound **8 (TG-05)** ( $\text{CD}_3\text{OD}$ , 500 MHz)

**Figure S30.**  $^{13}\text{C}$  NMR spectrum of compound **8** ( $\text{MeOD}_6$ , 100 MHz)

**Figure S31.**  $^1\text{H}$ NMR spectrum of compound **9 (TG-06)** ( $\text{CD}_3\text{OD}$ , 500 MHz)

**Figure S32.**  $^{13}\text{C}$  NMR spectrum of compound **9** ( $\text{CD}_3\text{OD}$ , 100 MHz)

**Table 1 S33.** Growth inhibitory effect of Extracts and enriched fractions

**Table 2 S34.** SRB assay-based screening results.

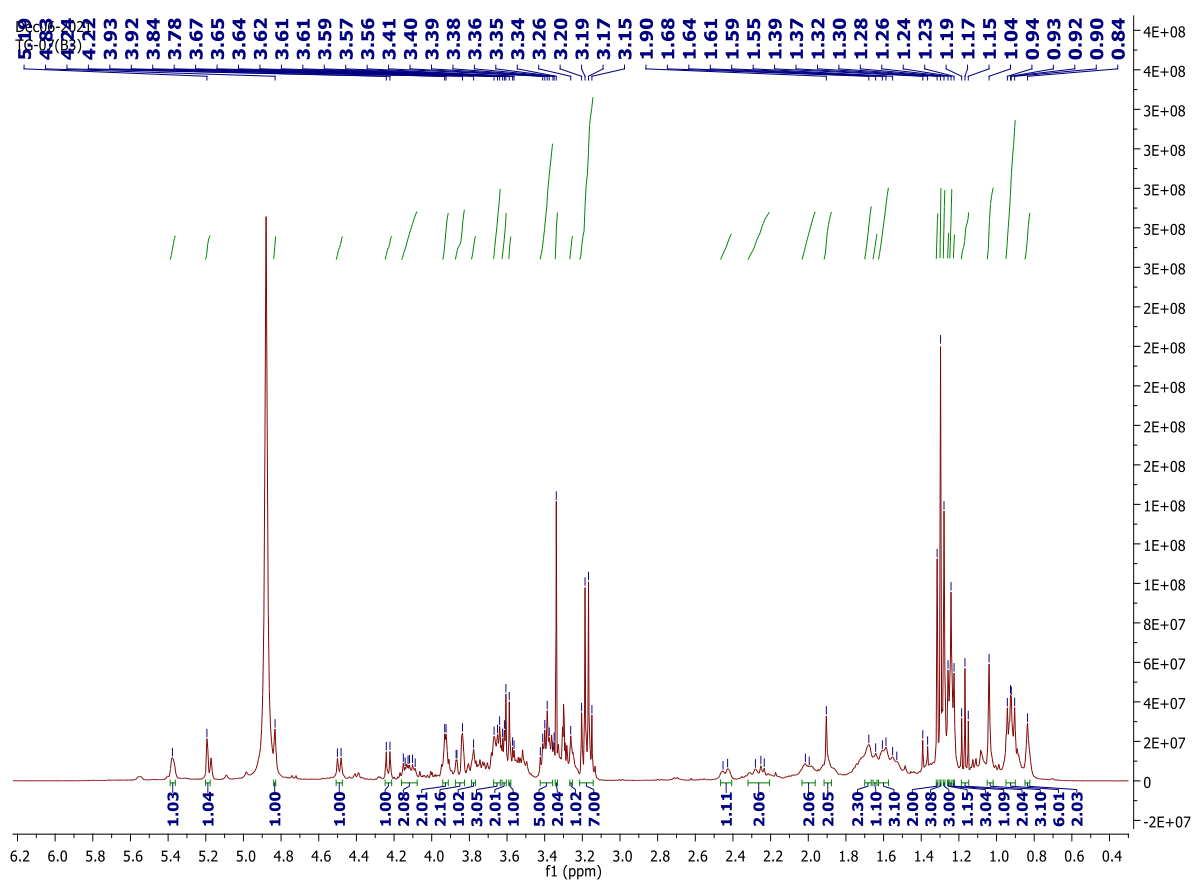

**Figure S1.**  $^1\text{H}$  NMR (400 MHz,  $\text{CD}_3\text{OD}$ ) of compound TG 07 B3

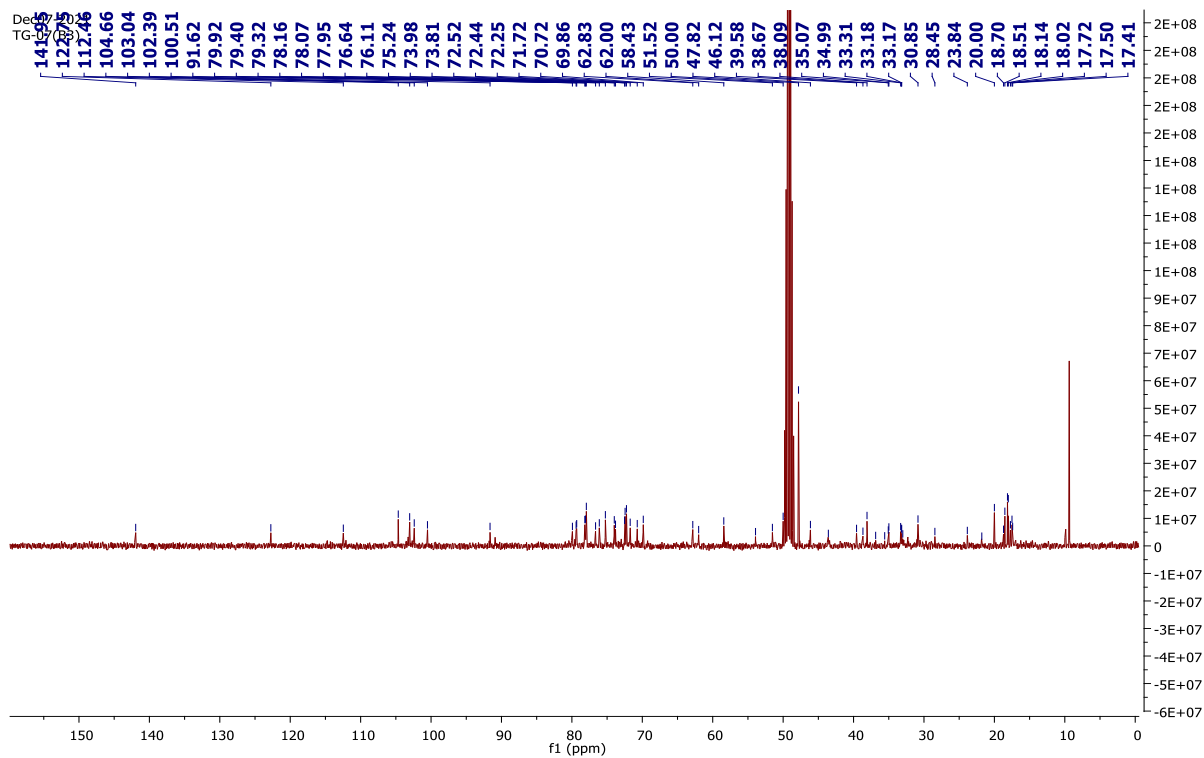

**Figure S2.**  $^{13}\text{C}$  NMR (400 MHz,  $\text{CD}_3\text{OD}$ ) of compound TG 07 B3

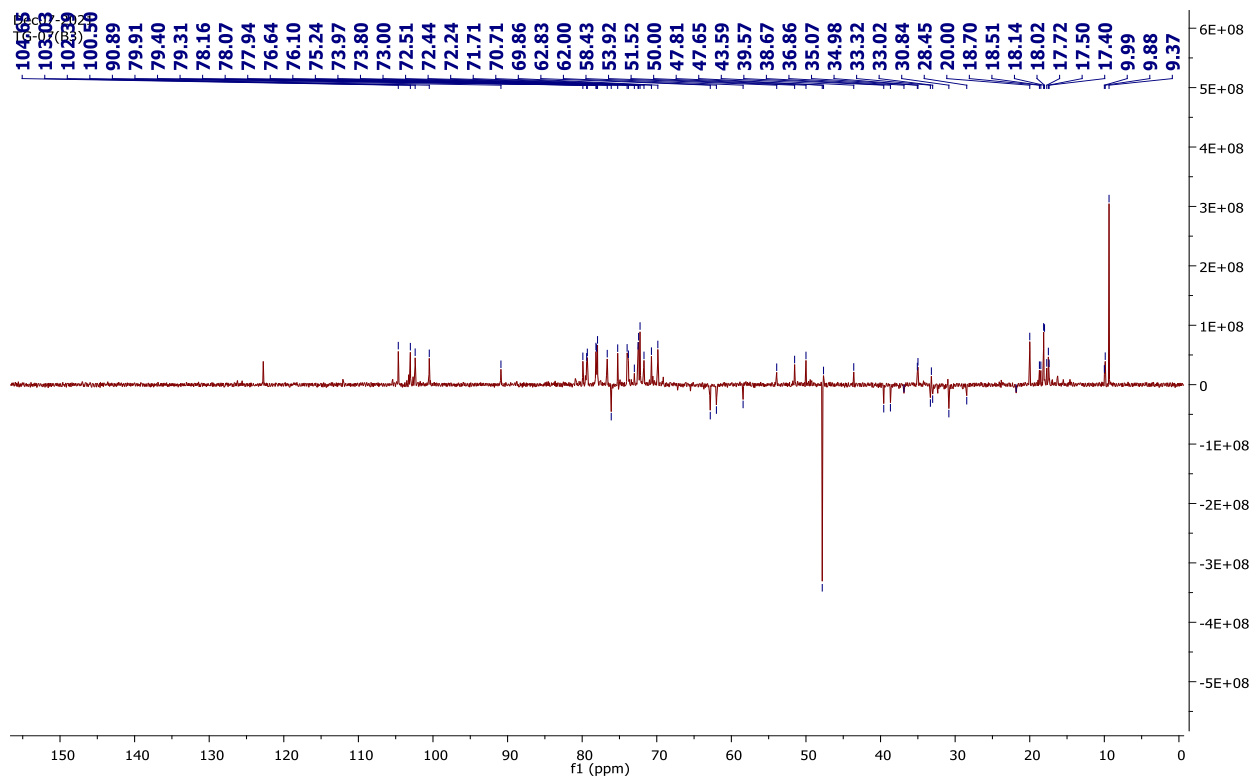

**Figure S3.** DEPT Spectra of compound TG 07 B3

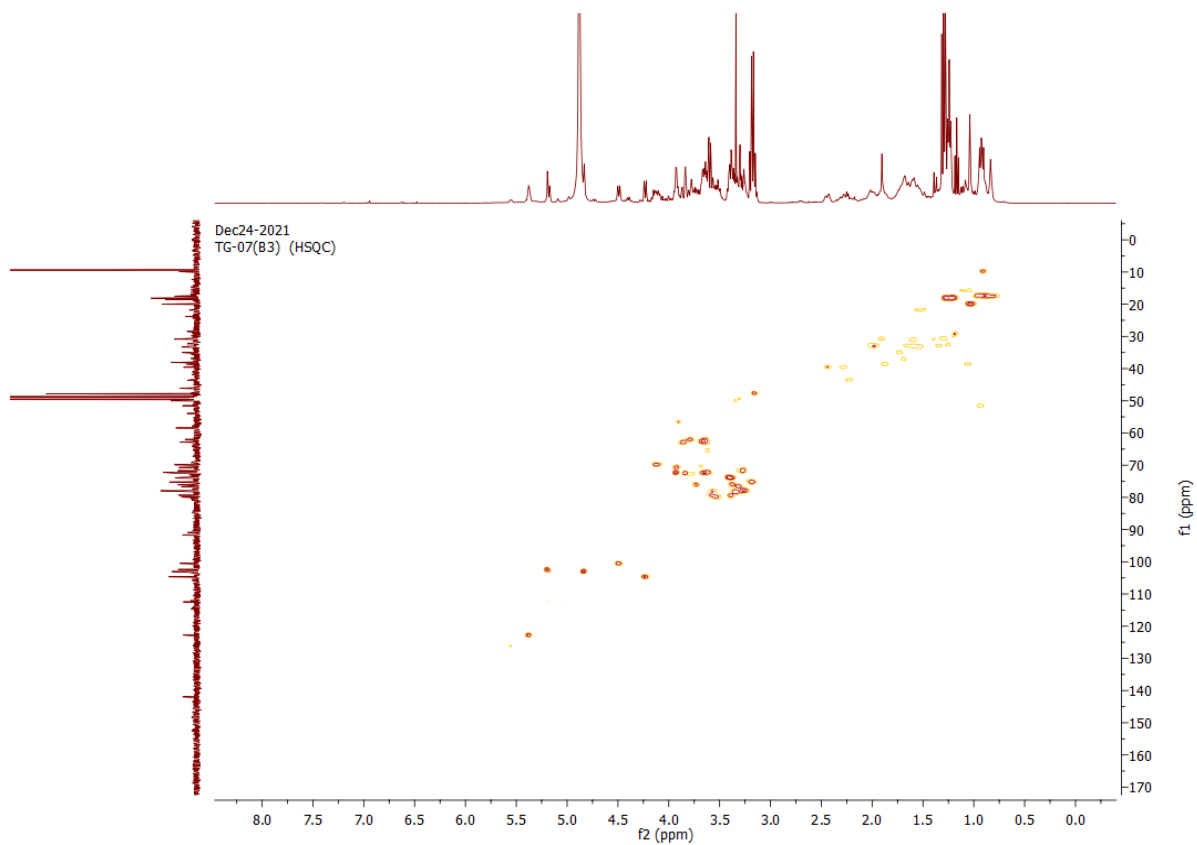

**Figure S4.** HSQC Spectra of compound TG 07 B3

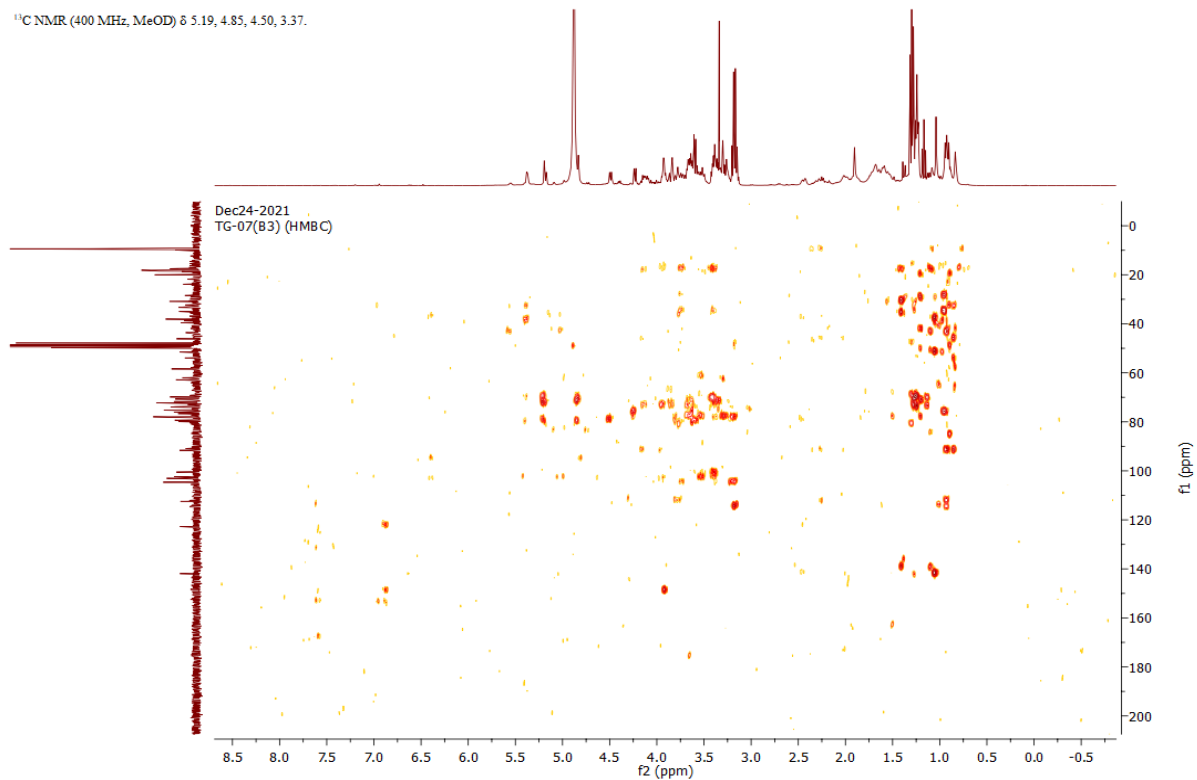

**Figure S5.** HMBC Spectra of compound TG 07 B3

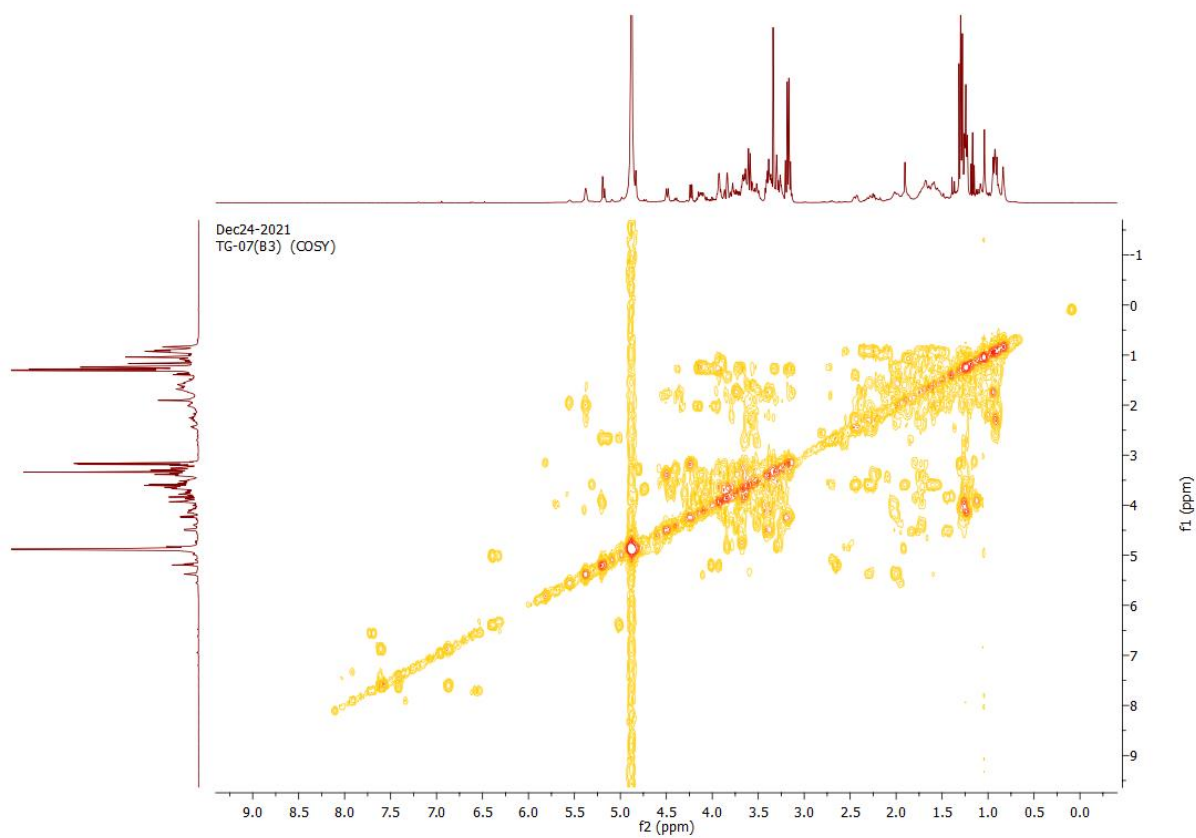

**Figure S6.** COSY Spectra of compound TG 07 B3

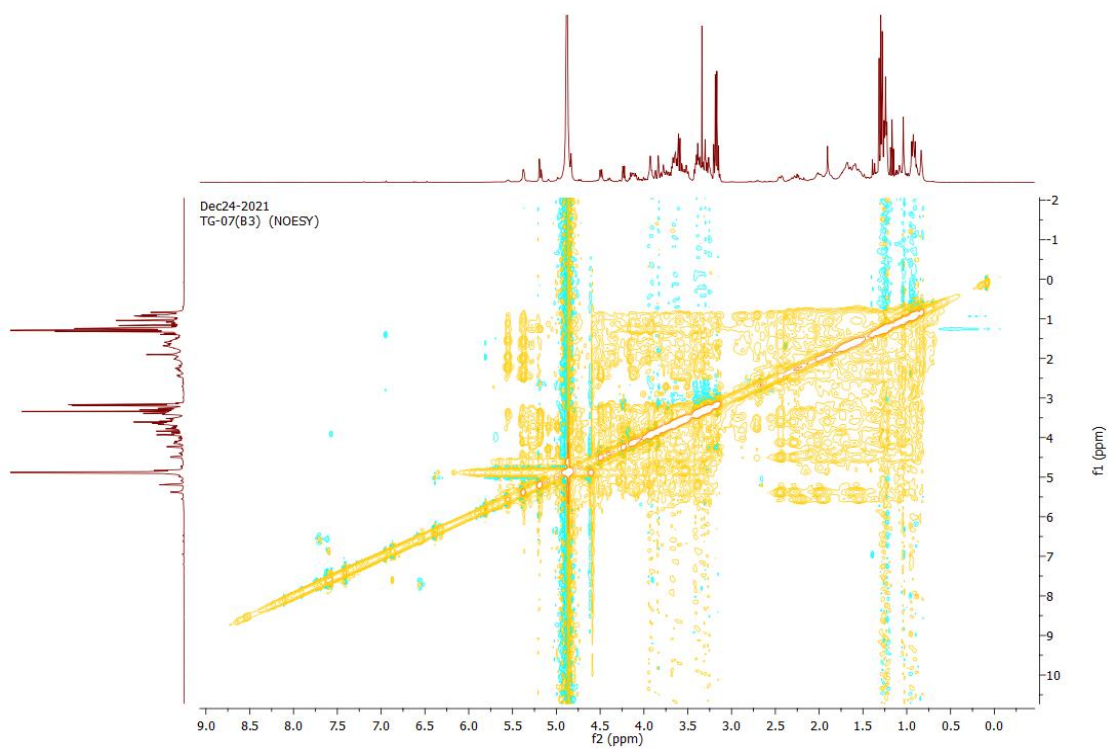

**Figure S7.** NOESY Spectra of compound TG 07 B3

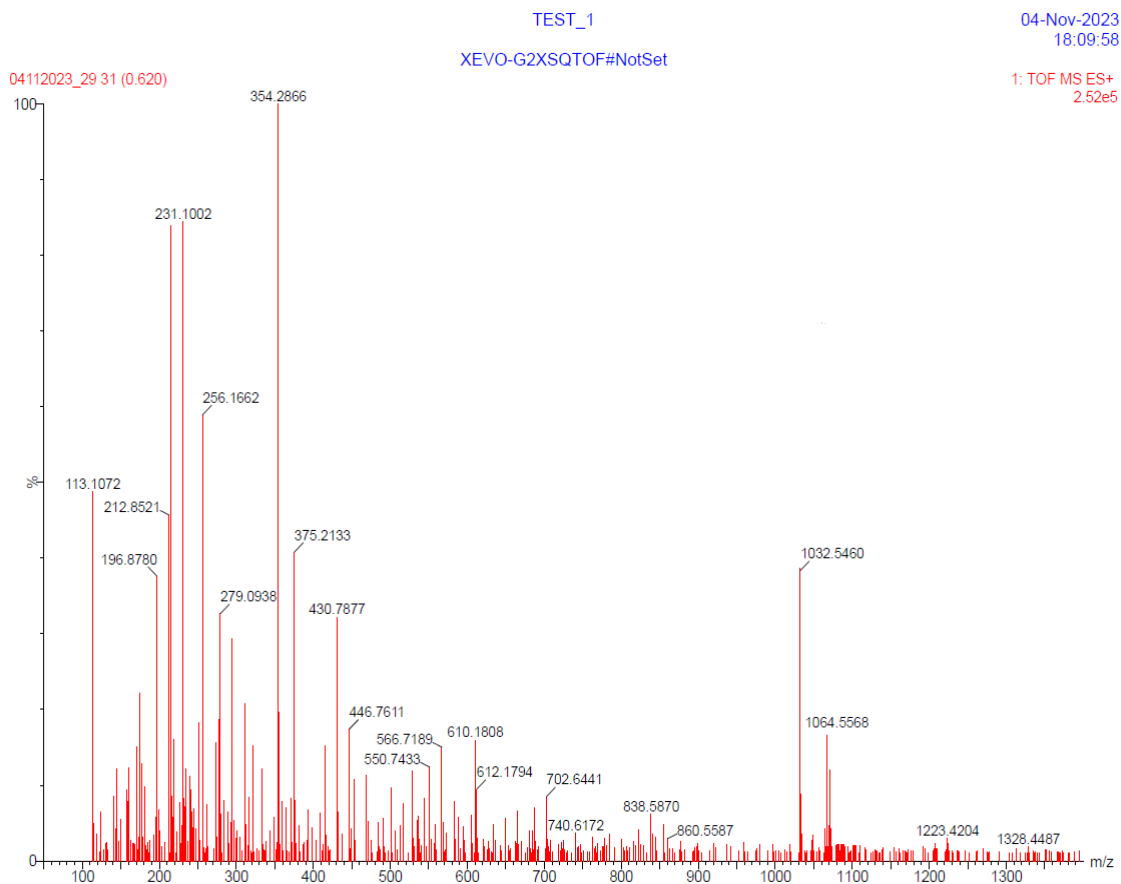

**Figure S8A.** LC/MS of Compound 1

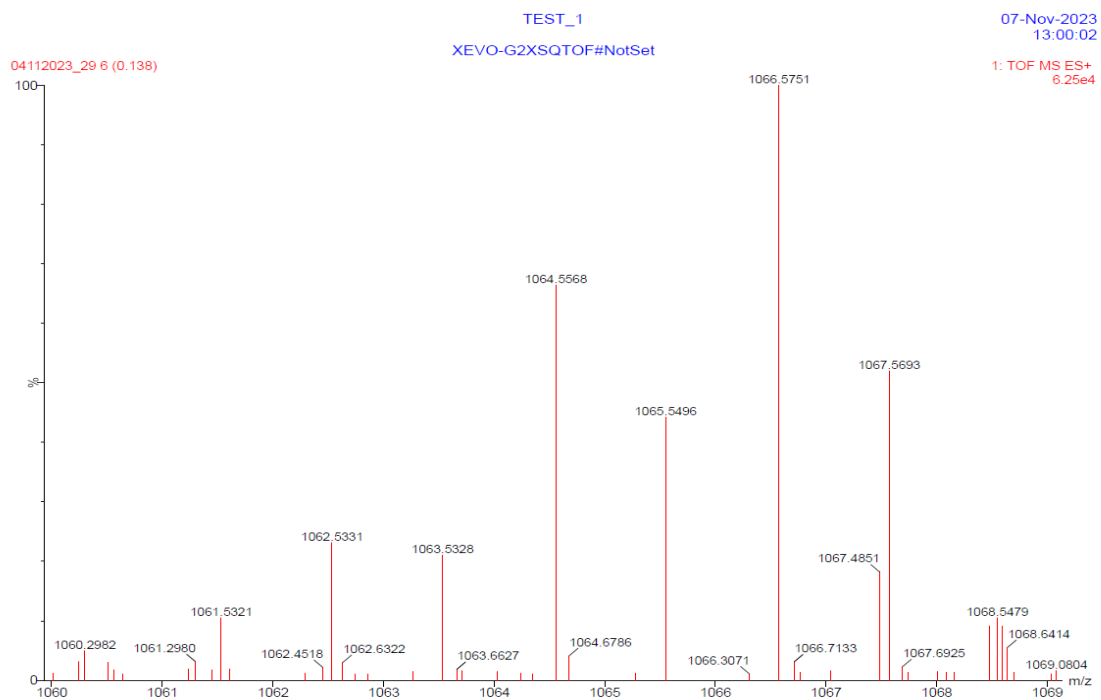

**Figure S8B.** LC/MS of Compound 1.

# IIM GCMS ANALYSIS REPORT

**Sample Information**

Analyzed by : ADMIN  
 Analyzed : 1/27/2022 12:05:44 AM  
 Sample Type : Unknown  
 Sample Name : TG+09  
 Sample Amount : 1  
 Vial # : 4  
 Injection Volume : 0.50  
 Data File : D:\GCMS DATA\LIQUID\JAN 2022\25.01.2022\25.01.2022 BHARTI035.qgd  
 Method File : D:\GCMS METHOD\GCMS-GENERAL\AMIT 1.qgm  
 Tuning File : D:\Tuning\Tuning-NM-F1 18.01.2022.qgt  
 Modified by : Admin  
 Modified : 1/27/2022 12:50:36 AM

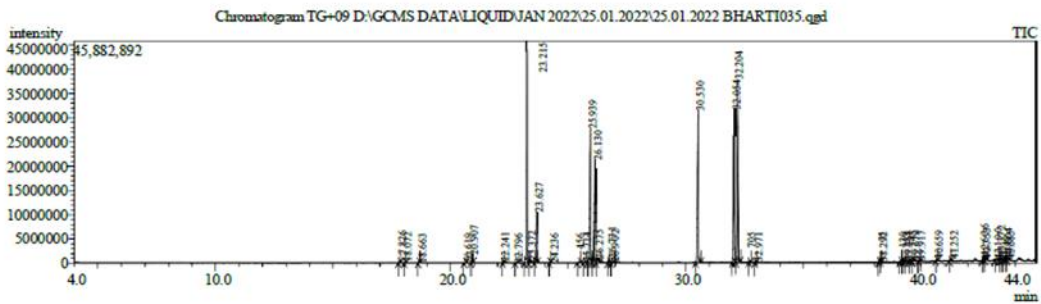

| Peak# | R.Time | Area      | Area% | Height   | Similarity | Name                                                           |
|-------|--------|-----------|-------|----------|------------|----------------------------------------------------------------|
| 1     | 23.215 | 111246953 | 6.60  | 45790083 | 93         | Acetyl 2,3,4-tri-O-acetyl-6-deoxy- $\alpha$ -D-glucopyranosid  |
| 2     | 23.627 | 26047880  | 1.89  | 10498744 | 96         | $\alpha$ -1-Talopyranoside, methyl 6-deoxy-, triacetate        |
| 3     | 25.939 | 99084960  | 14.79 | 27692680 | 95         | Acetyl 2,3,4-tri-O-acetyl-6-deoxy- $\alpha$ -D-glucopyranoside |
| 4     | 26.130 | 73864469  | 11.02 | 21246385 | 92         | 115.05 Tetraacetyl- $\beta$ -D-rhamnose                        |
| 5     | 30.530 | 113234727 | 16.90 | 31488565 | 97         | Methyl 2,3,4,6-tetra-O-acetyl- $\beta$ -D-glucopyranoside      |
| 6     | 32.054 | 915066032 | 23.66 | 31798909 | 94         | $\beta$ -D-Galactopyranose, pentaacetate                       |
| 7     | 32.204 | 110910512 | 16.55 | 37520918 | 93         | $\beta$ -D-Glucopyranose pentaacetate                          |

**Figure S9.** GC/MS analysis of compound 1 (TG 07 B3)

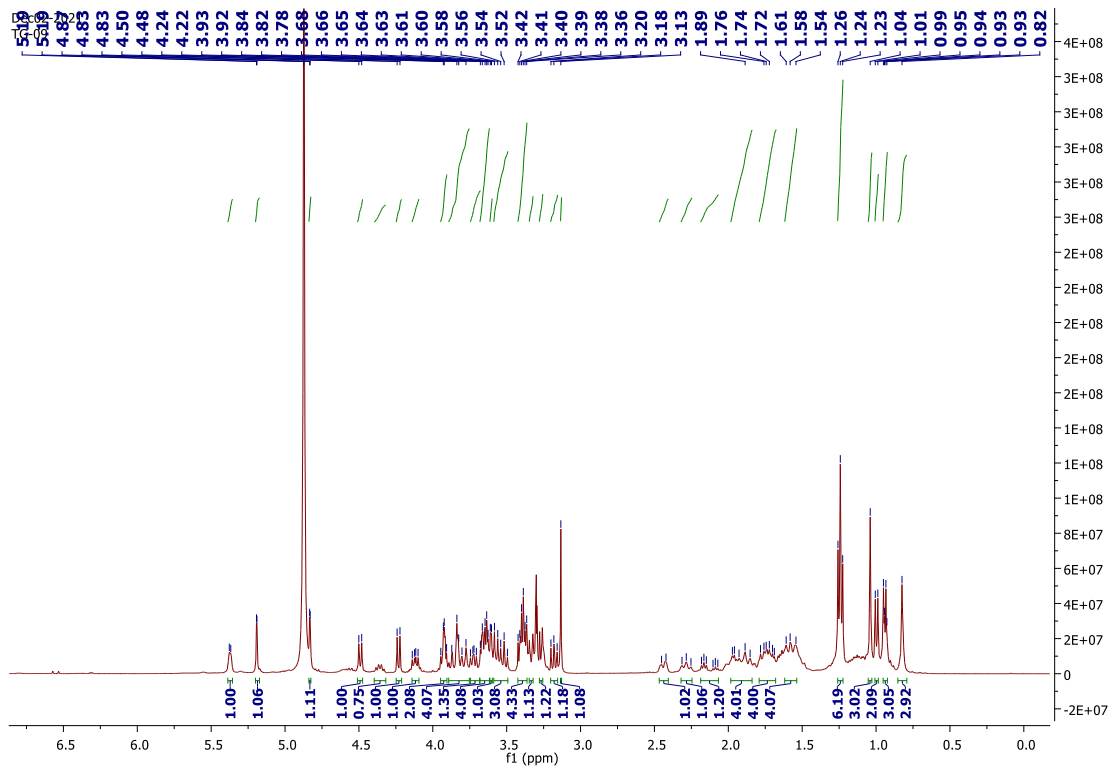



**Figure S10.**  $^1\text{H}$  NMR (400 MHz,  $\text{CD}_3\text{OD}$ ) of compound TG 09

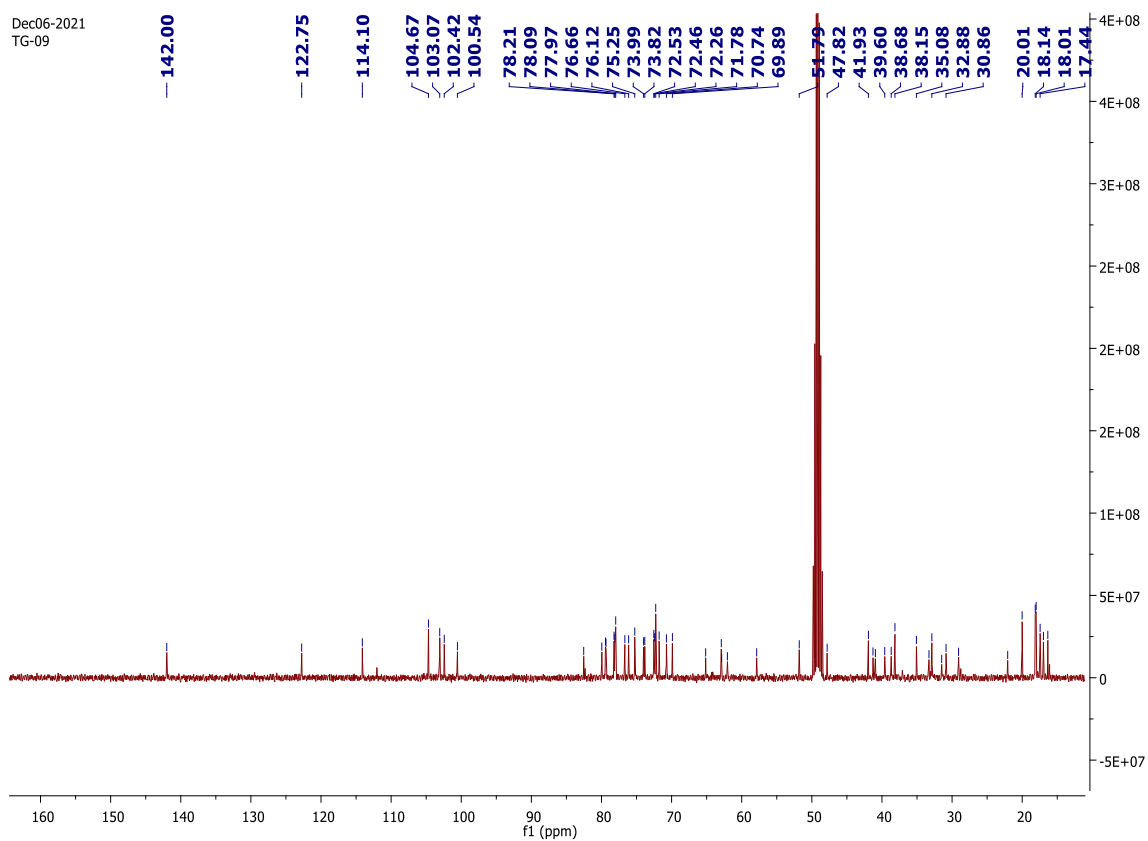

**Figure S11.**  $^{13}\text{C}$  NMR (400 MHz,  $\text{CD}_3\text{OD}$ ) of compound TG 09

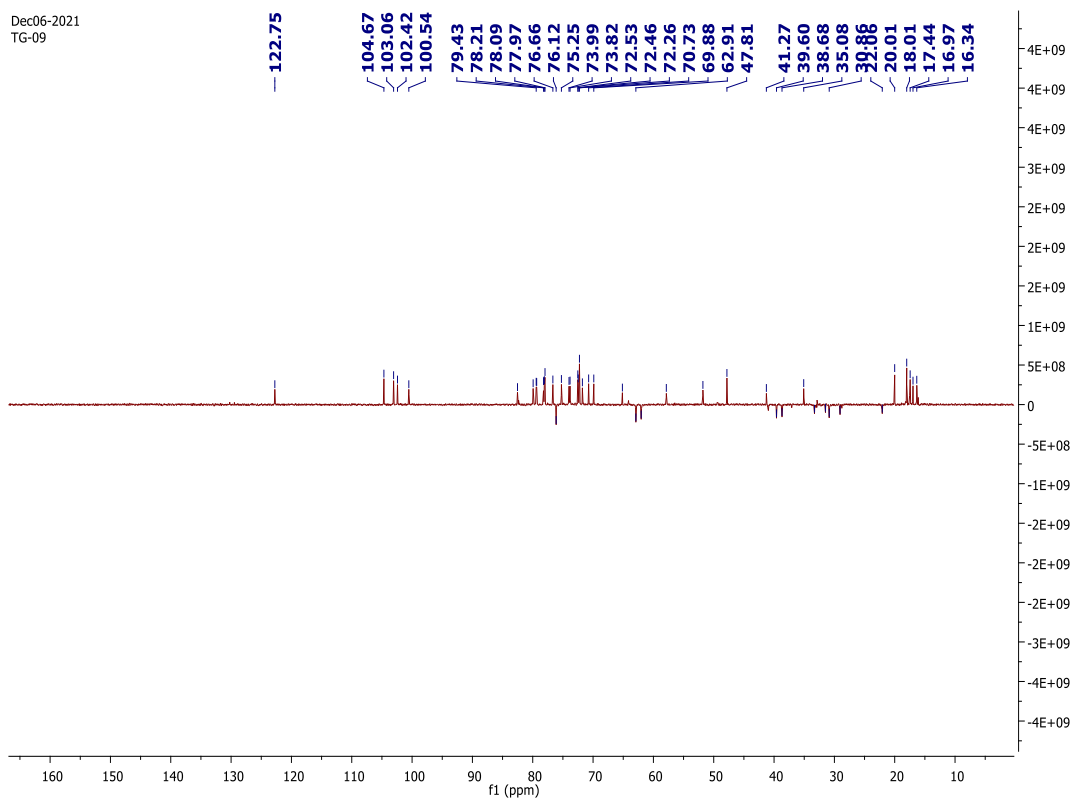

**Figure S12.** DEPT Spectra of compound TG 09

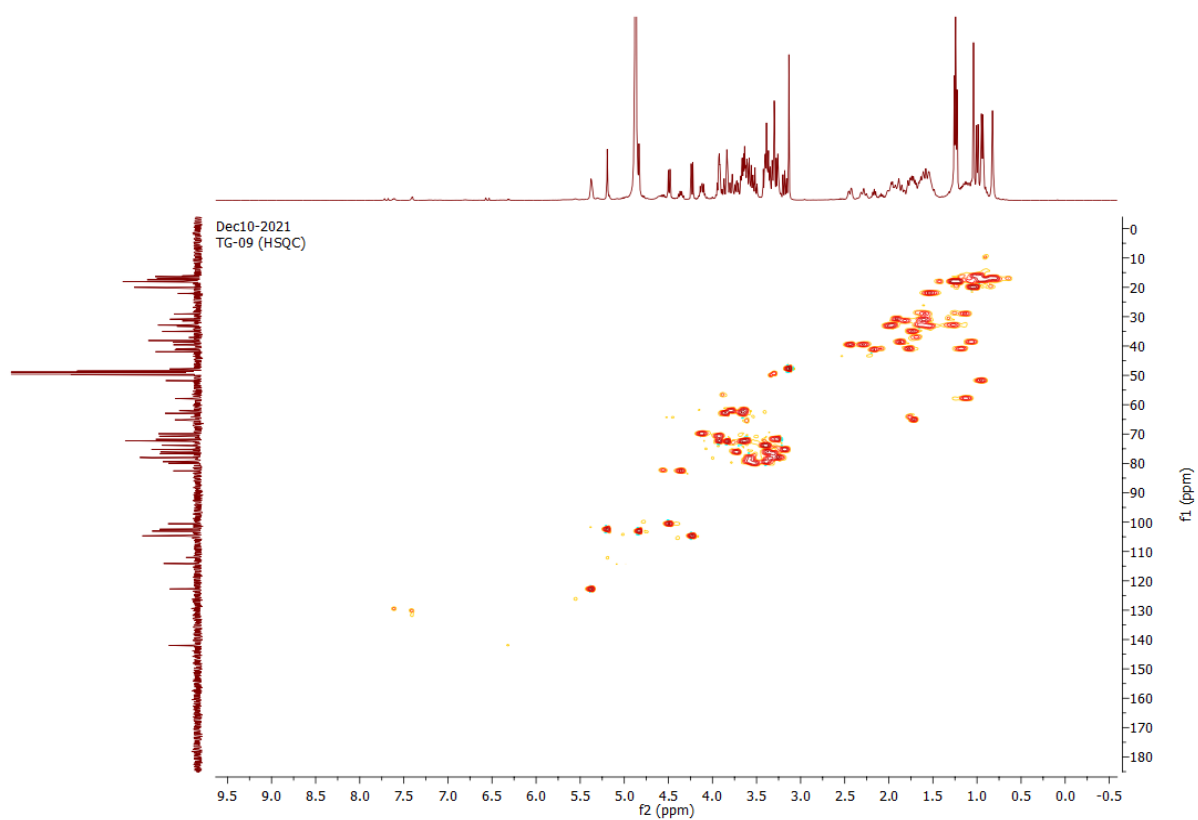

**Figure S13.** HSQC Spectra of compound TG 09

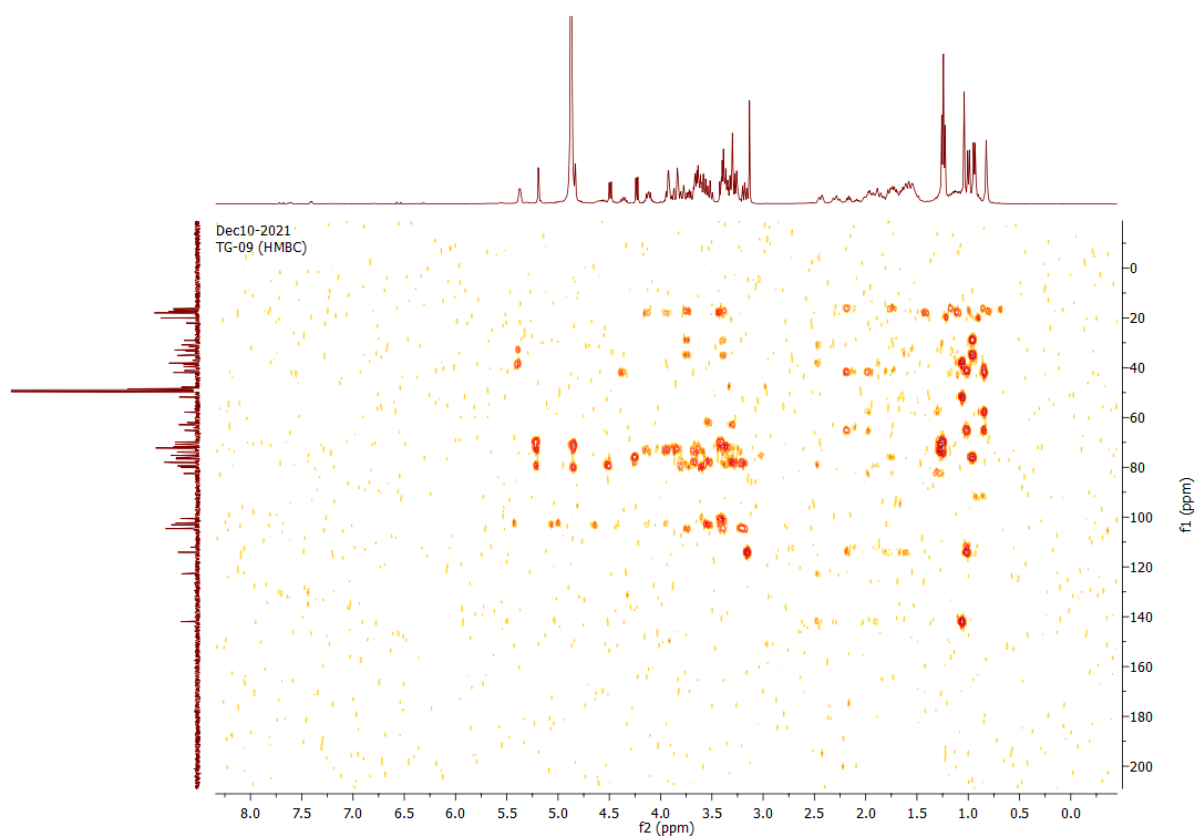

**Figure S14.** HMBC Spectra of compound TG 09

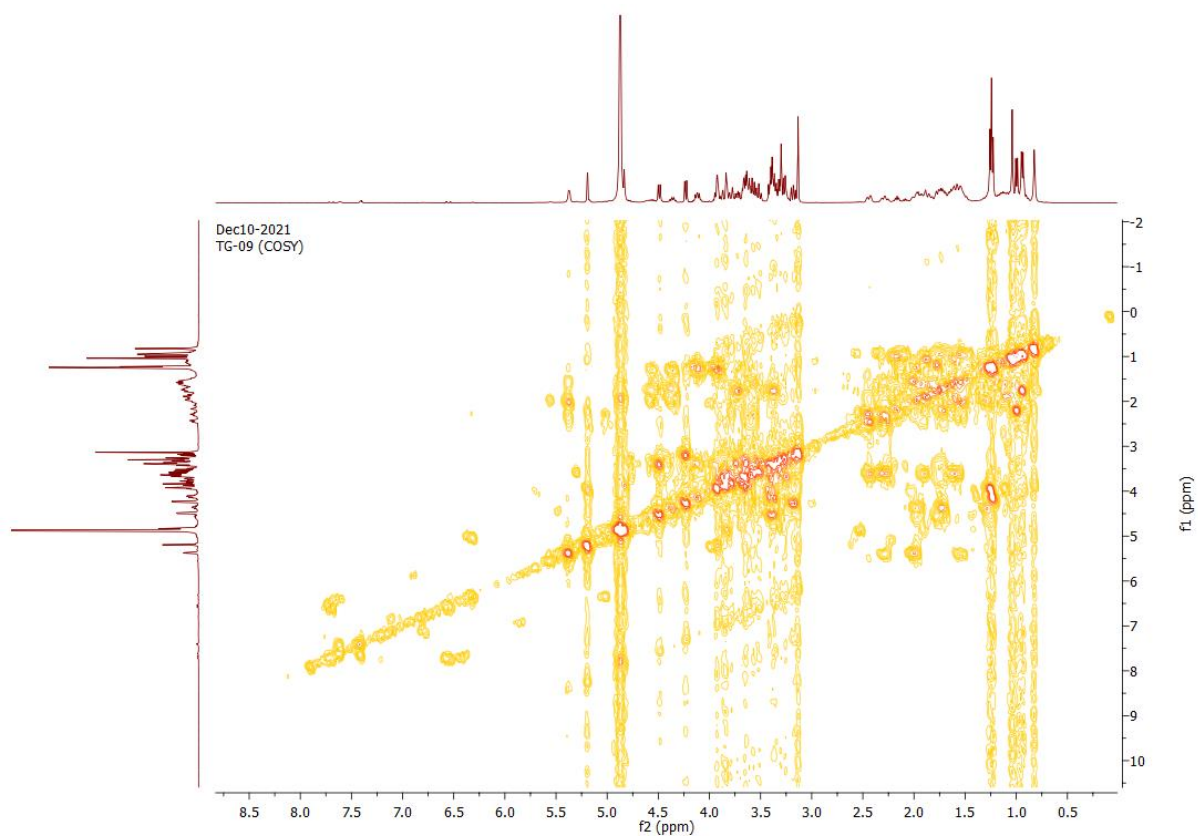

**Figure S15.** COSY Spectra of compound TG 09

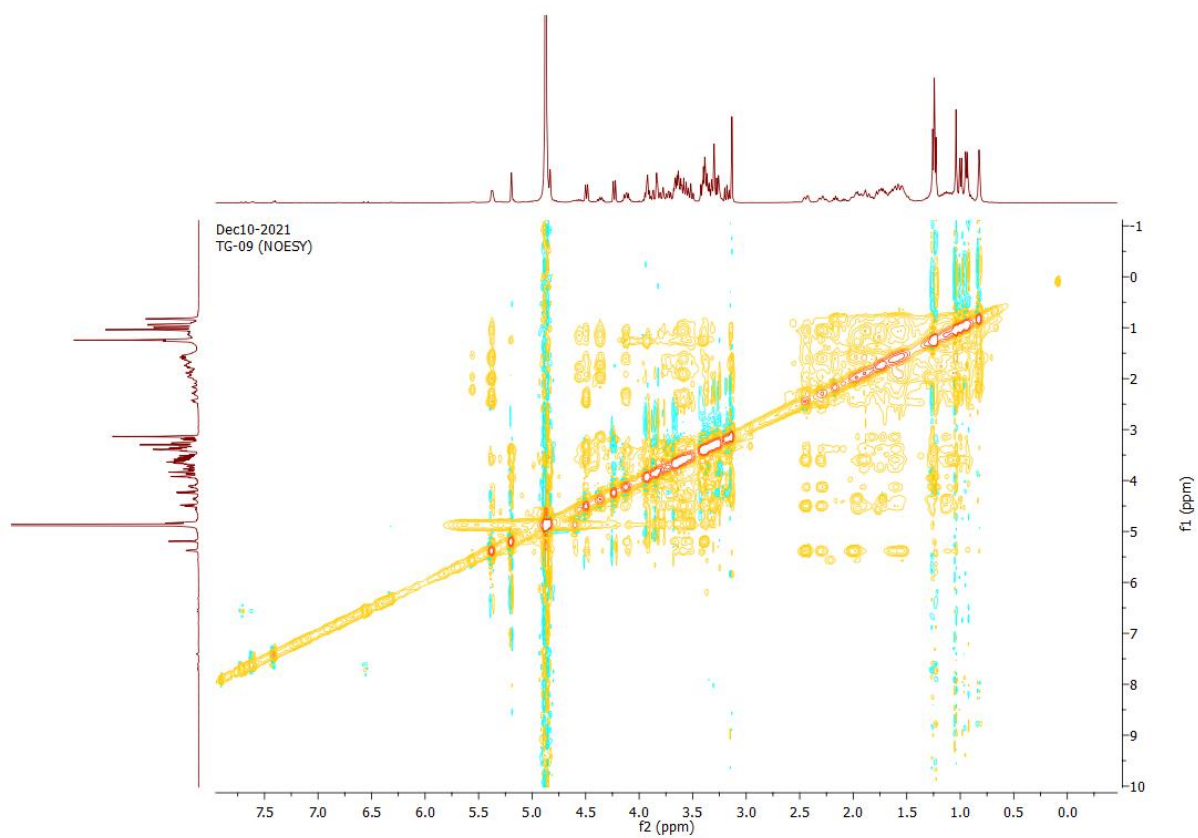

**Figure S16.** NOESY Spectra of compound TG 09

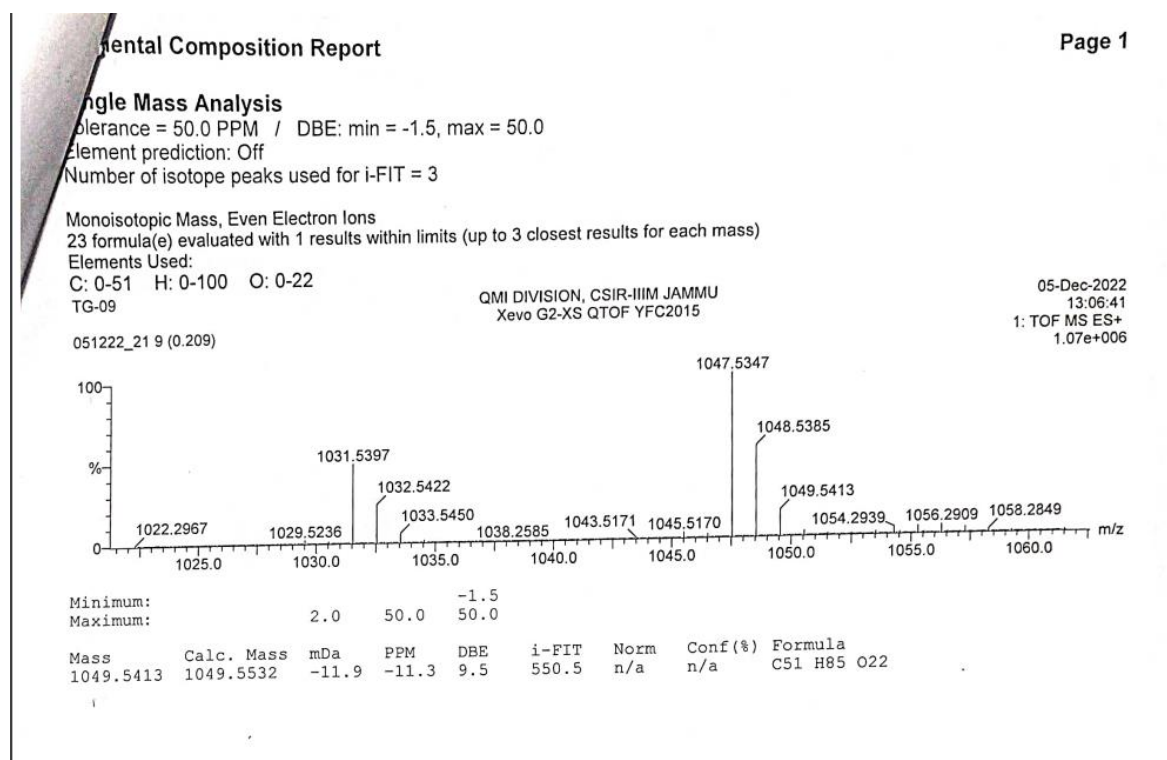

**Figure S17.** HR-ESIMS of compound TG 09

### IIIM GCMS ANALYSIS REPORT

**Sample Information**

Analyzed by : ADMIN  
 Analyzed : 1/26/2022 11:14:29 PM  
 Sample Type : Unknown  
 Sample Name : TG-07(B3)  
 Sample Amount : 1  
 Vial# : 3  
 Injection Volume : 0.50  
 Data File : D:\GCMS DATA\LIQUID\JAN 2022\25.01.2022\25.01.2022 BHARTI034.qgd  
 Method File : D:\GCMS METHOD\GCMS-GENERAL\AMIT 1.qgm  
 Tuning File : D:\Tuning\Tuning-NM-F1 18.01.2022.qgt  
 Modified by : Admin  
 Modified : 1/26/2022 11:59:21 PM

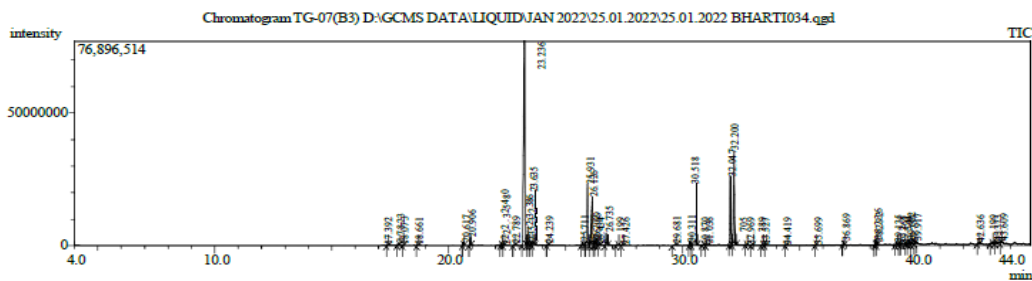

| Peak# | R.Time | Area      | Area% | Height   | Similarity | Peak Report TIC Name                                          |
|-------|--------|-----------|-------|----------|------------|---------------------------------------------------------------|
| 1     | 23.215 | 231224721 | 28.46 | 76755223 | 93         | Acetyl 2,3,4-tri-O-acetyl-6-deoxy- $\alpha$ -D-glucopyranosid |
| 2     | 23.635 | 55669651  | 6.85  | 18773884 | 95         | $\alpha$ -L-Talopyranoside, methyl 6-deoxy-, triacetate       |
| 3     | 25.931 | 84146429  | 10.36 | 23296999 | 95         | Methyl 2,3,4-tri-O-acetyl-6-deoxy- $\alpha$ -D-glucopyranosid |
| 4     | 26.126 | 63098359  | 7.77  | 18205988 | 93         | Acetyl 2,3,4-tri-O-acetyl-6-deoxy- $\beta$ -D-glucopyranoside |
| 5     | 26.202 | 4369319   | 13.54 | 1550231  | 88         | Tetraacetyl- $\beta$ -L-rhamnose                              |
| 6     | 25.530 | 3965918   | 0.49  | 1363282  | 94         | $\alpha$ -D-Xylopyranose, tetraacetate                        |
| 7     | 32.047 | 71127361  | 18.75 | 25857099 | 95         | $\beta$ -D-Galactopyranose, pentaacetate                      |
| 8     | 32.200 | 99974618  | 12.30 | 35119152 | 93         | $\beta$ -D-Glucopyranose pentaacetate                         |

**Figure S18.** GC/MS analysis of compound TG 07 B3

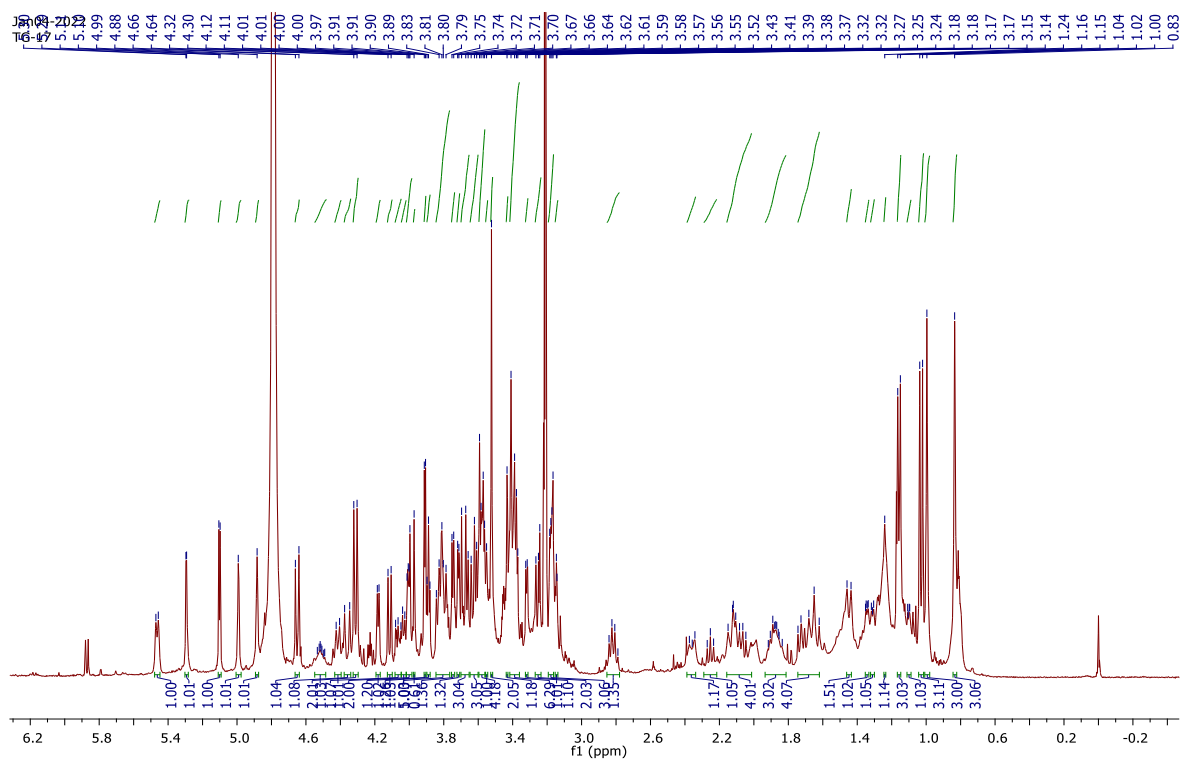

**Figure S19.**  $^1\text{H}$ NMR spectrum of compound **3** (TG-12) ( $\text{CD}_3\text{OD}$ , 500 MHz)

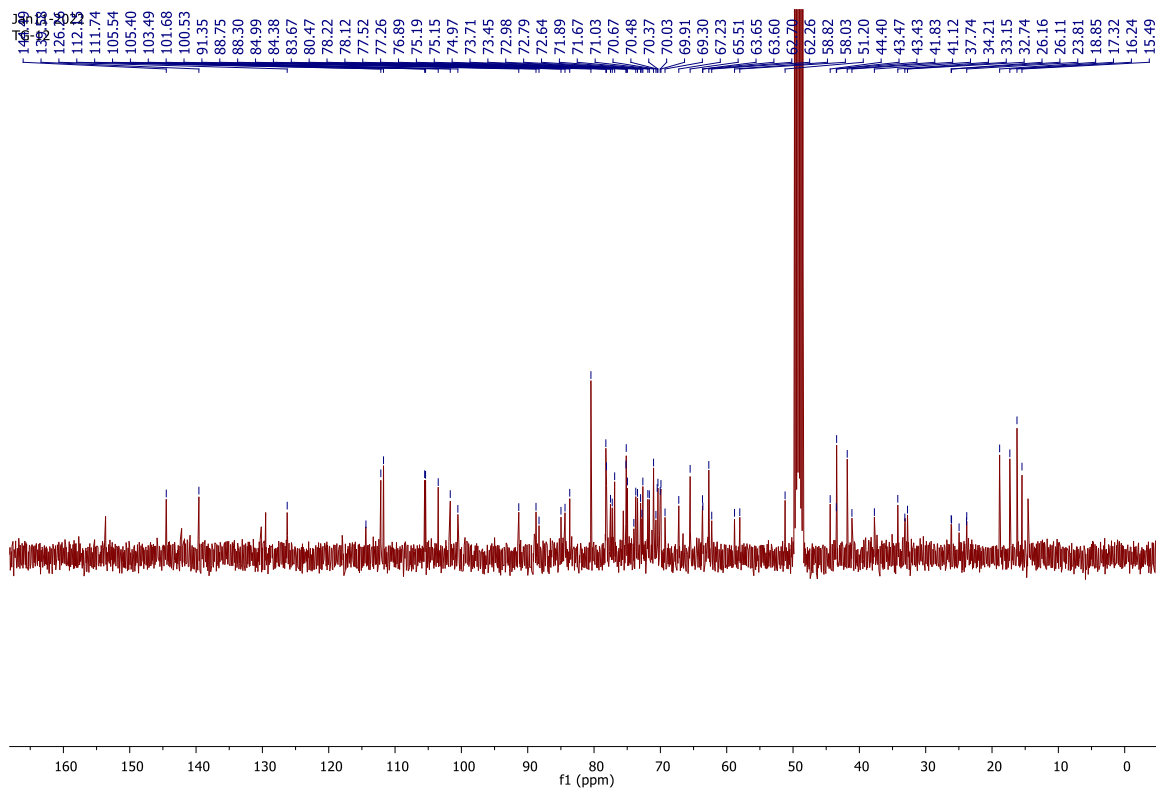

**Figure S20.**  $^{13}\text{C}$  NMR spectrum of compound **3** ( $\text{CD}_3\text{OD}$ , 100 MHz)

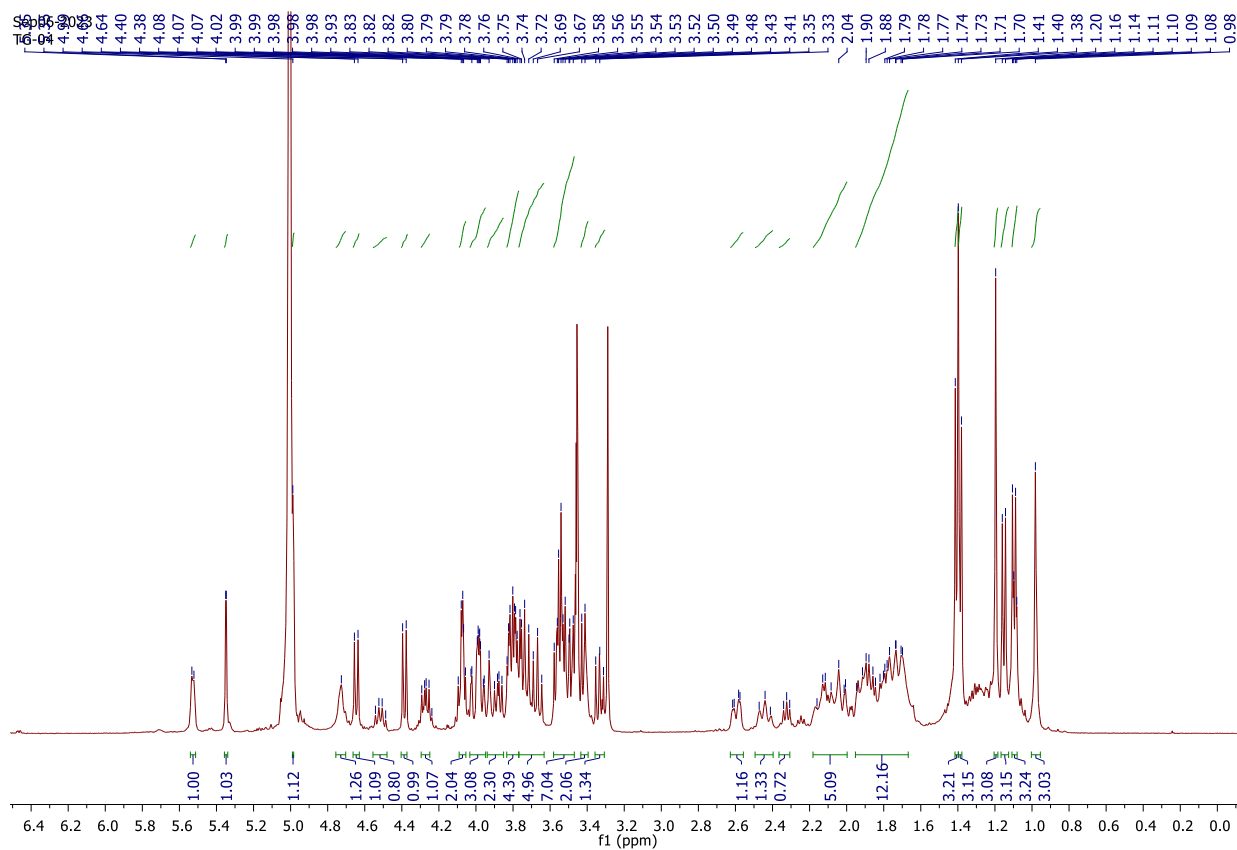

**Figure S21.**  $^1\text{H}$ NMR spectrum of compound **4** (TG-04) ( $\text{CD}_3\text{OD}$ , 500 MHz)

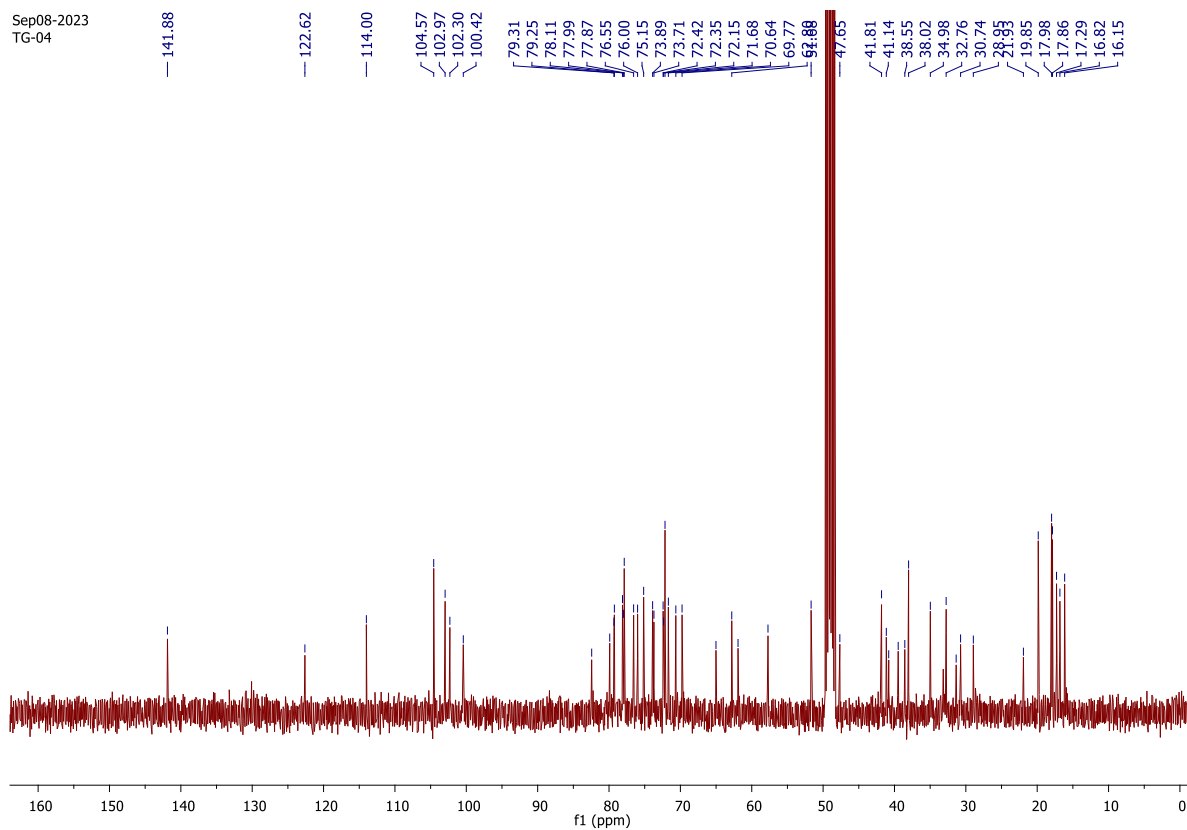

**Figure S22.**  $^{13}\text{C}$  NMR spectrum of compound **4** ( $\text{CD}_3\text{OD}$ , 100 MHz)

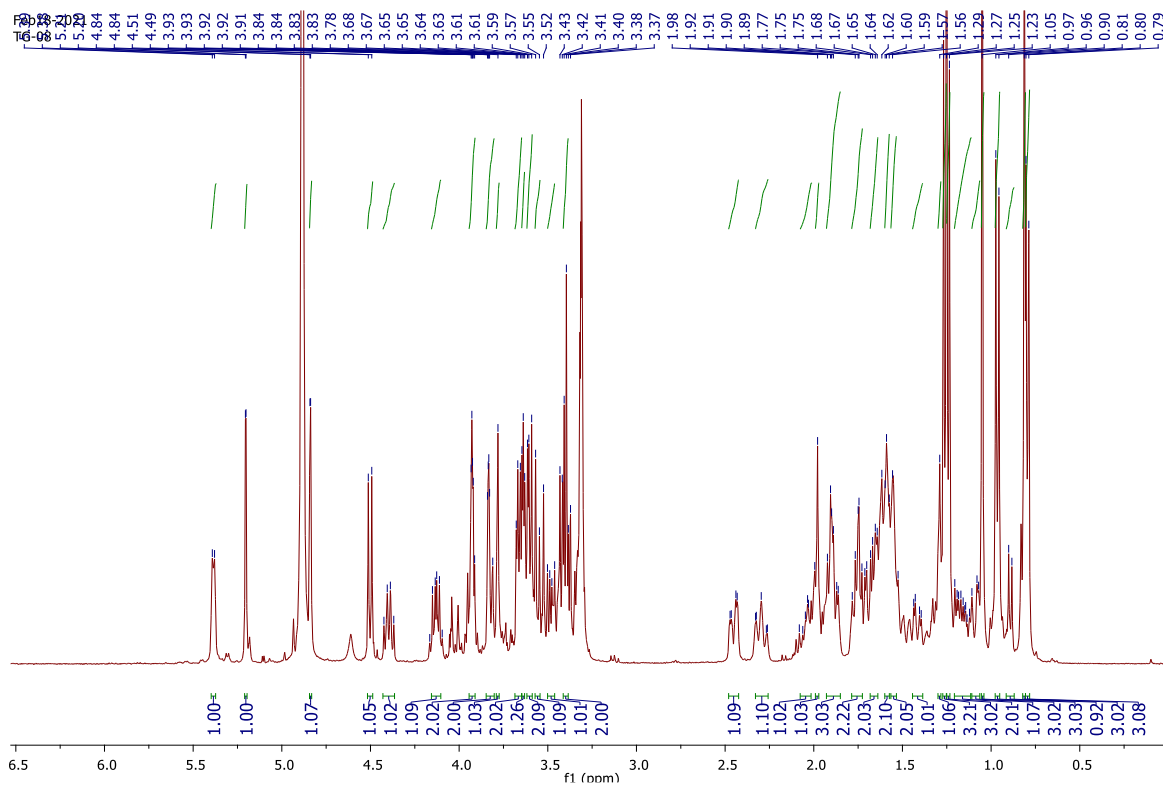

**Figure S23.**  $^1\text{H}$ NMR spectrum of compound **5** (TG-08) ( $\text{CD}_3\text{OD}$ , 500 MHz)

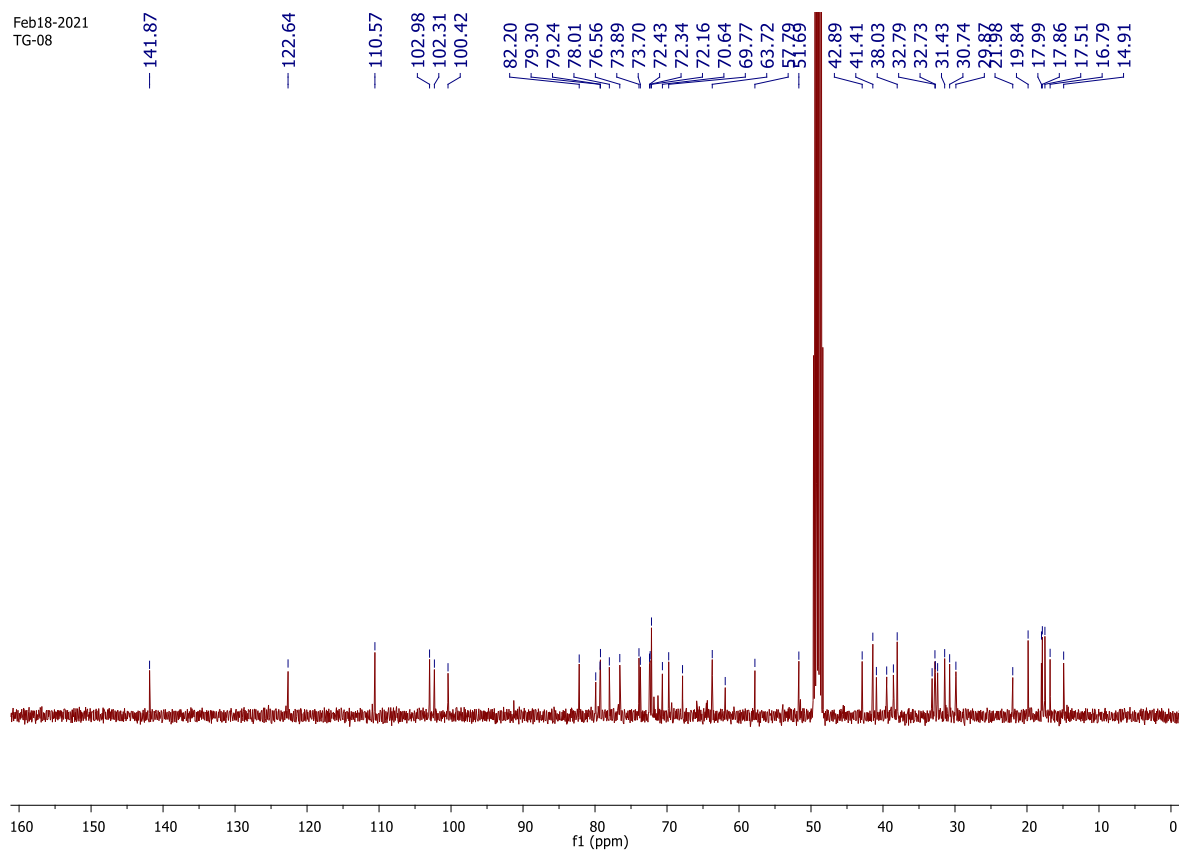

**Figure S24.**  $^{13}\text{C}$  NMR spectrum of compound **5** ( $\text{CD}_3\text{OD}$ , 100 MHz)

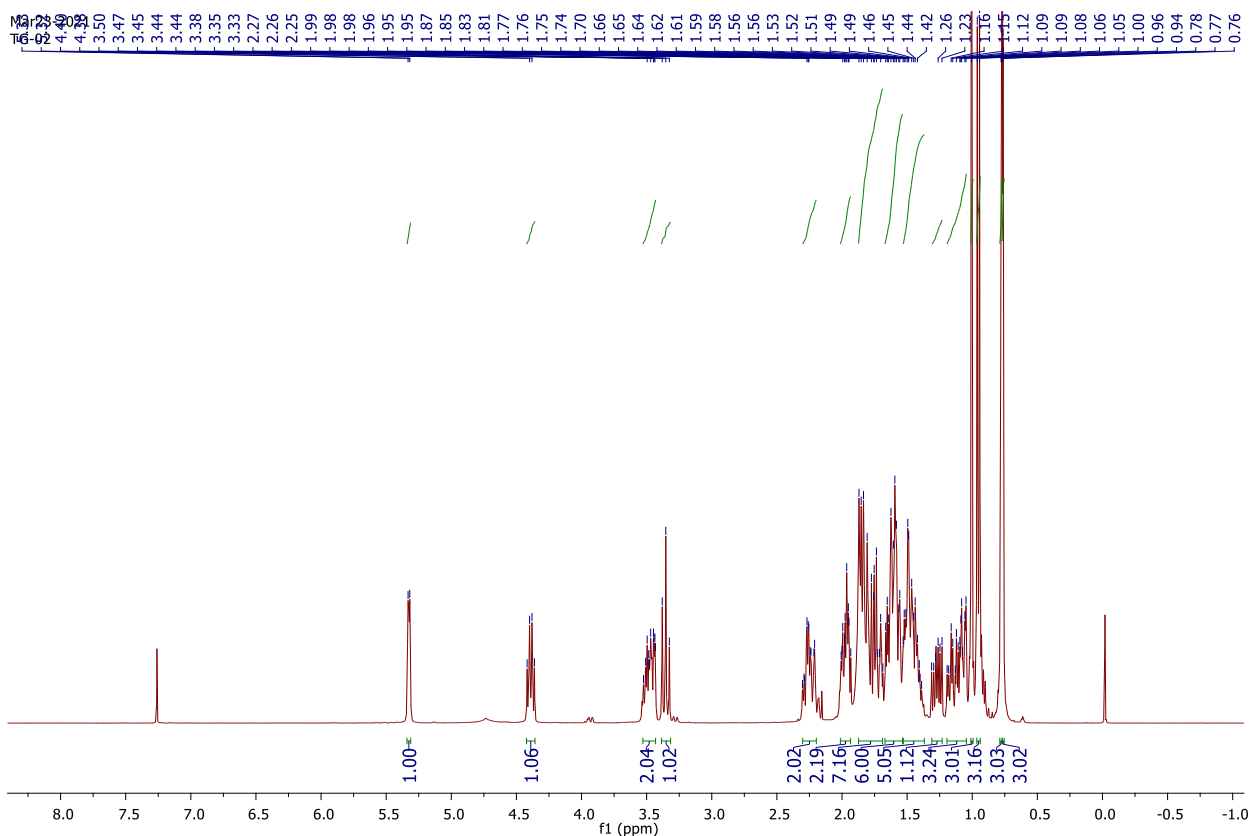

**Figure S25.**  $^1\text{H}$ NMR spectrum of compound **6** (TG-02) ( $\text{CD}_3\text{OD}$ , 500 MHz)

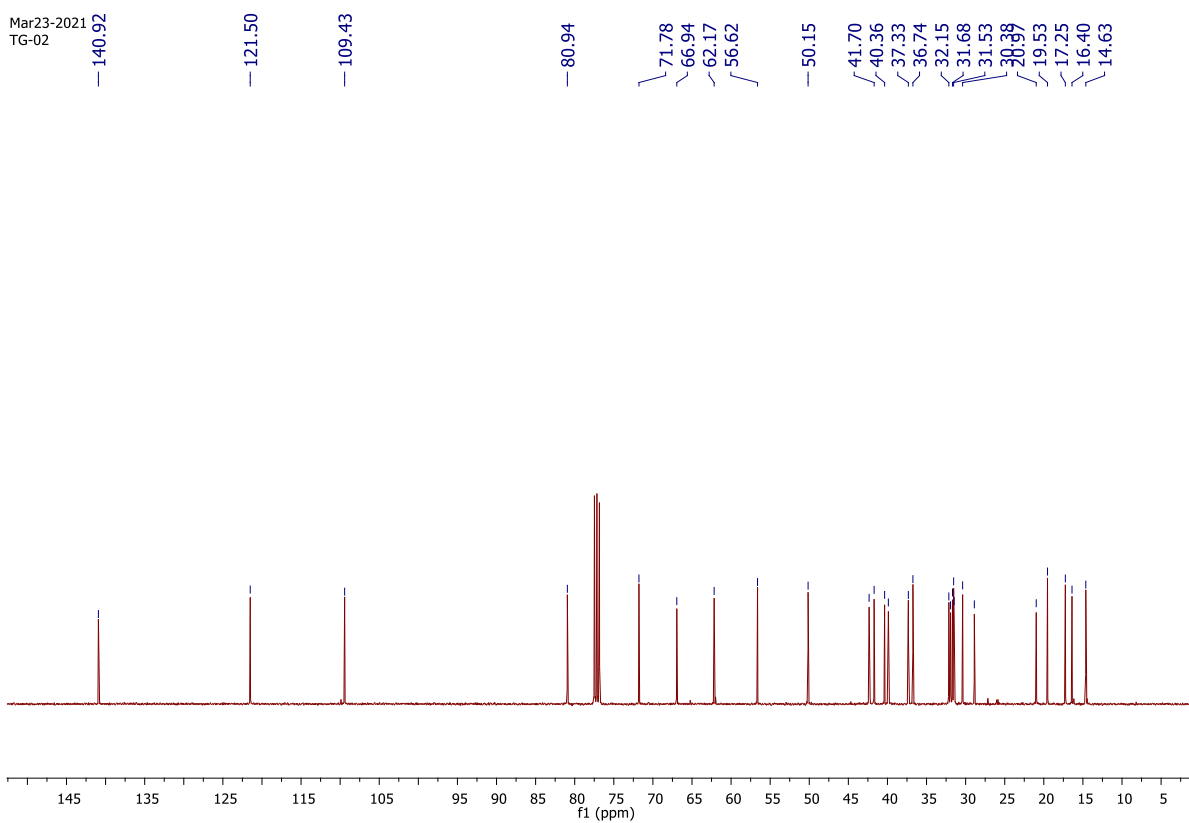

**Figure S26.**  $^{13}\text{C}$  NMR spectrum of compound **6** ( $\text{CD}_3\text{OD}$ , 100 MHz)



Nov10-2020  
TG-01

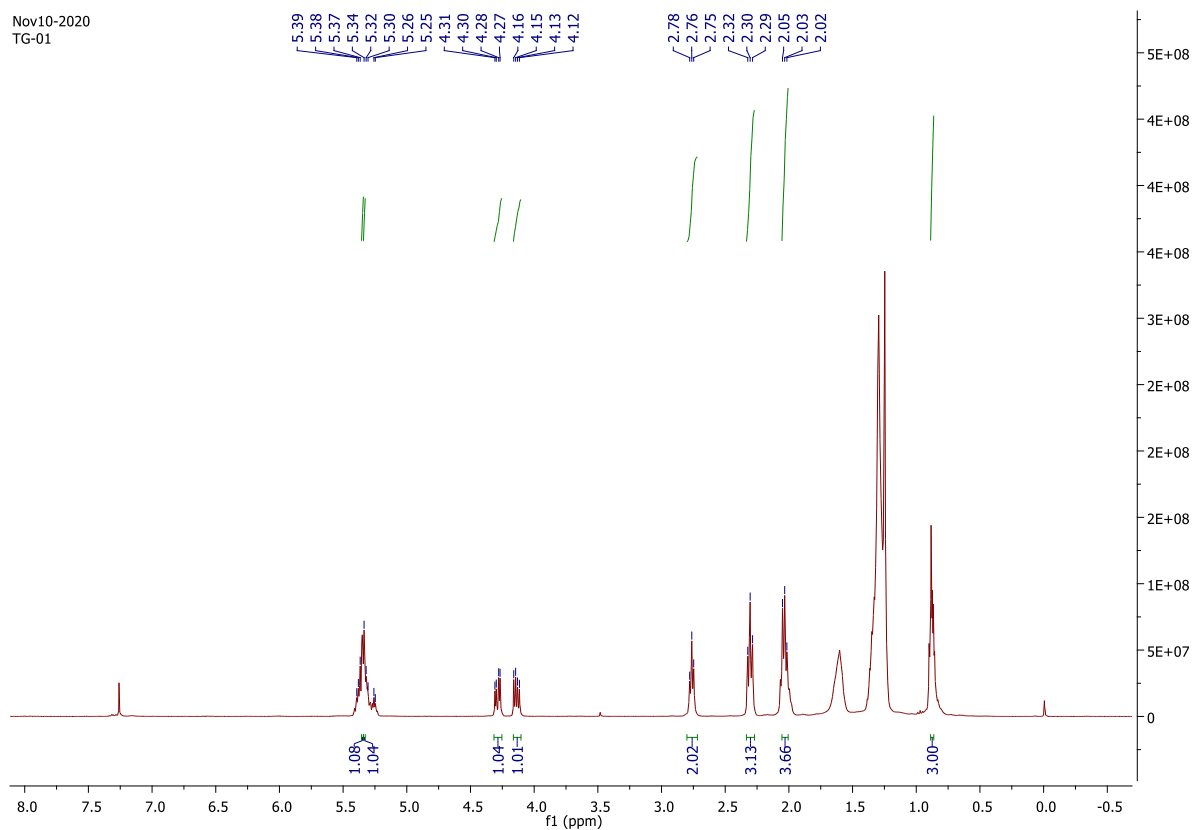

**Figure S27.**  $^1\text{H}$ NMR spectrum of compound **7** (TG-02) ( $\text{CDCl}_3$ , 500 MHz)

Nov10-2020  
TG-01

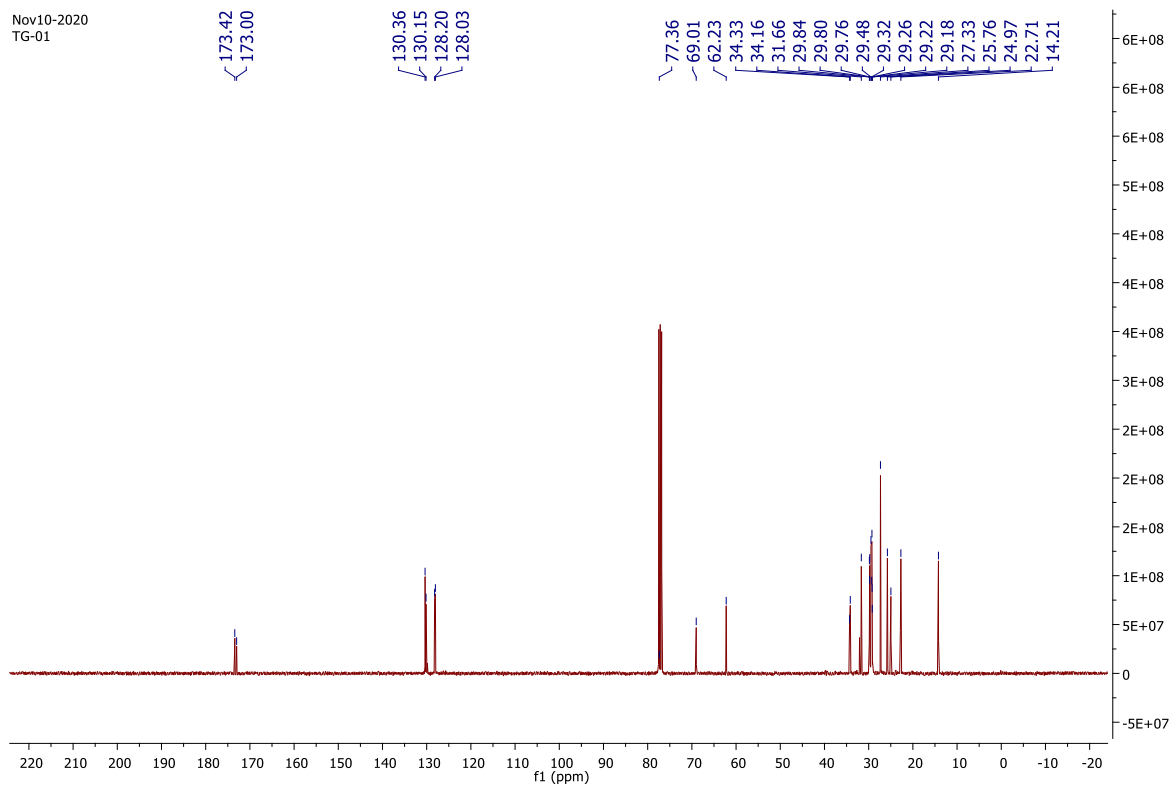

**Figure S28.**  $^{13}\text{C}$  NMR spectrum of compound **7** ( $\text{CDCl}_3$ , 100 MHz)

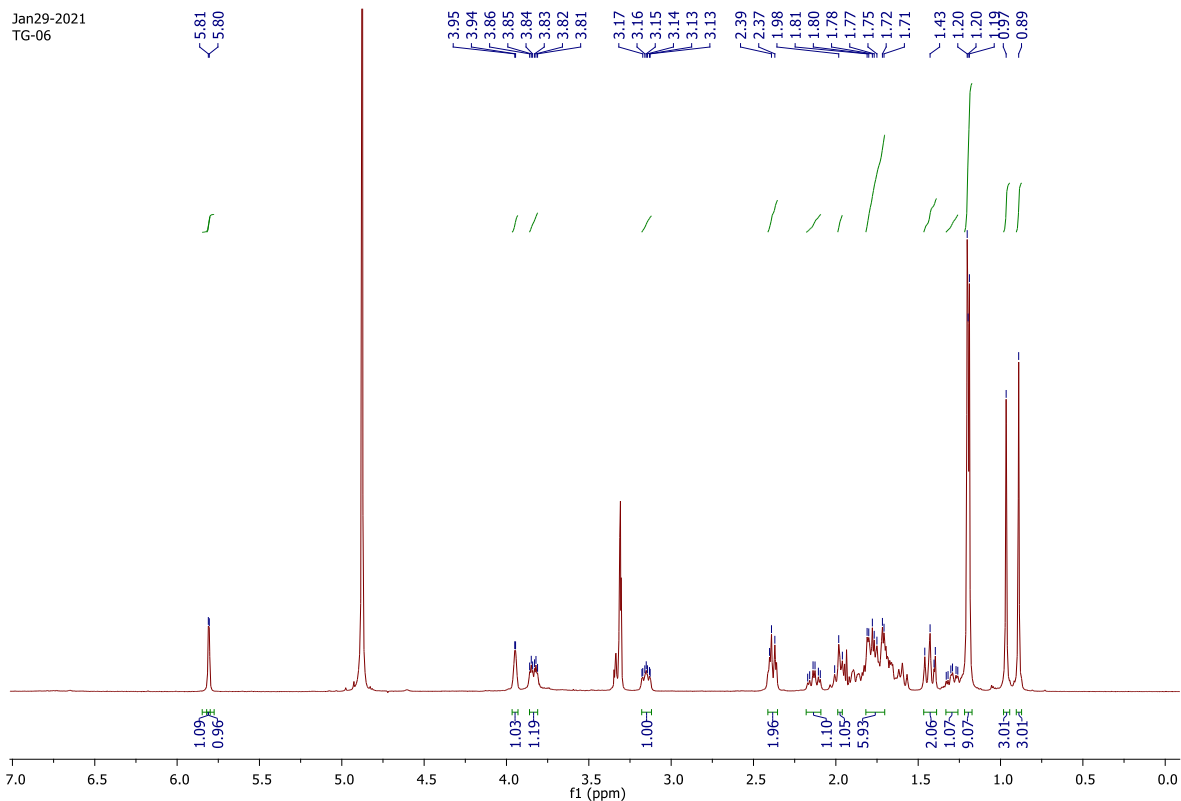

**Figure S29.**  $^1\text{H}$ NMR spectrum of compound **8** (TG-05) ( $\text{CD}_3\text{OD}$ , 500 MHz)

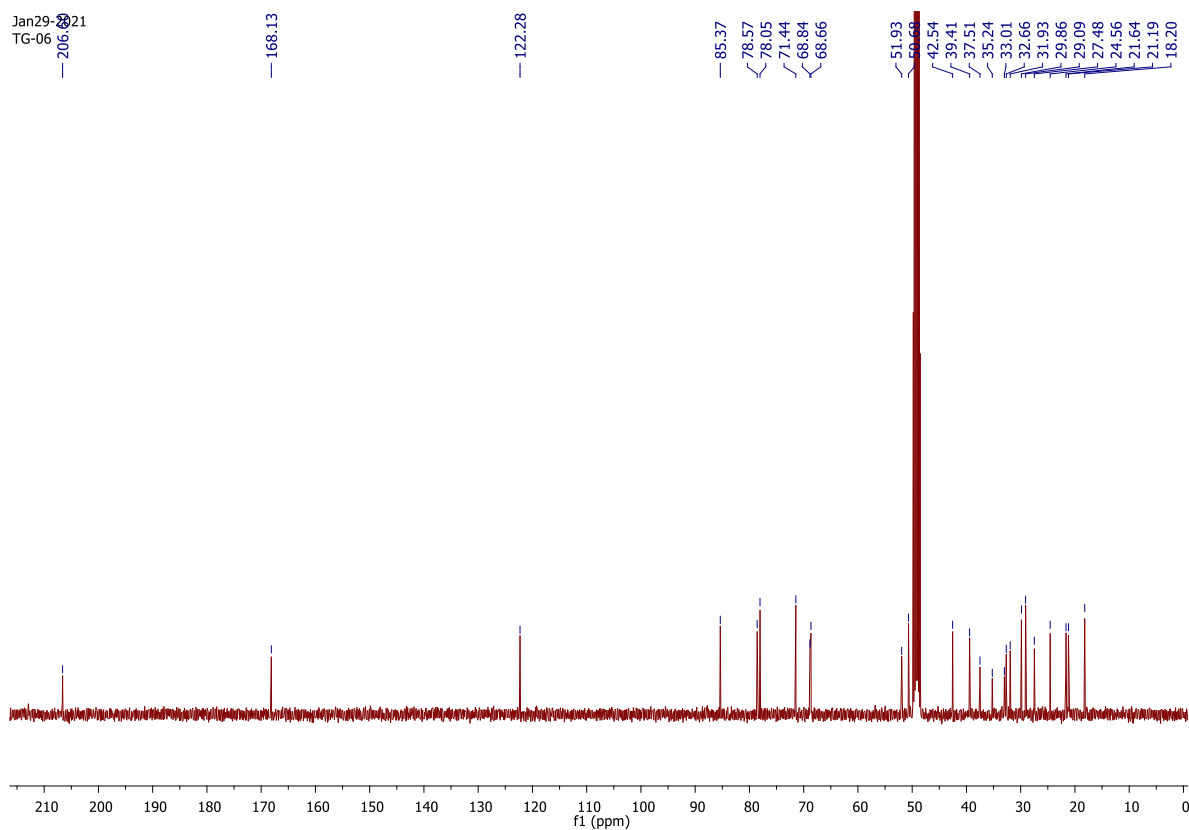

**Figure S30.**  $^{13}\text{C}$  NMR spectrum of compound **8** ( $\text{MeOD}_6$ , 100 MHz)

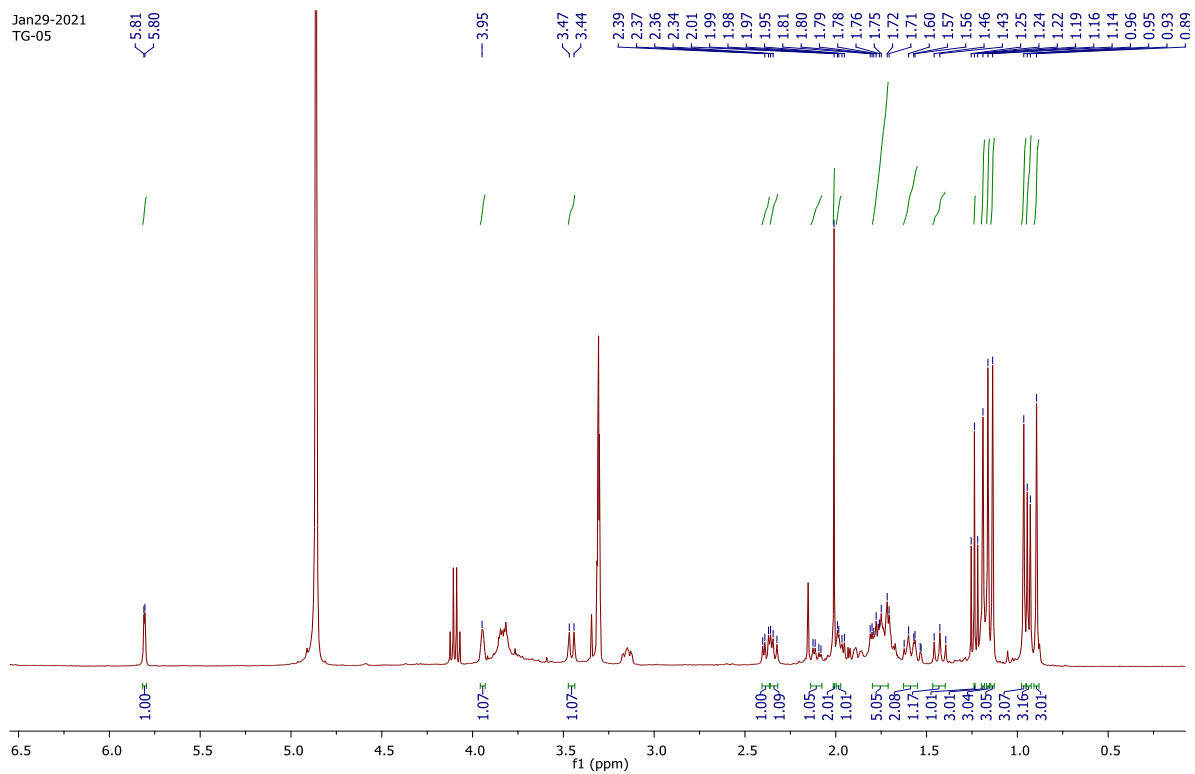

**Figure S31.**  $^1\text{H}$ NMR spectrum of compound **9** (TG-06) ( $\text{CD}_3\text{OD}$ , 500 MHz)

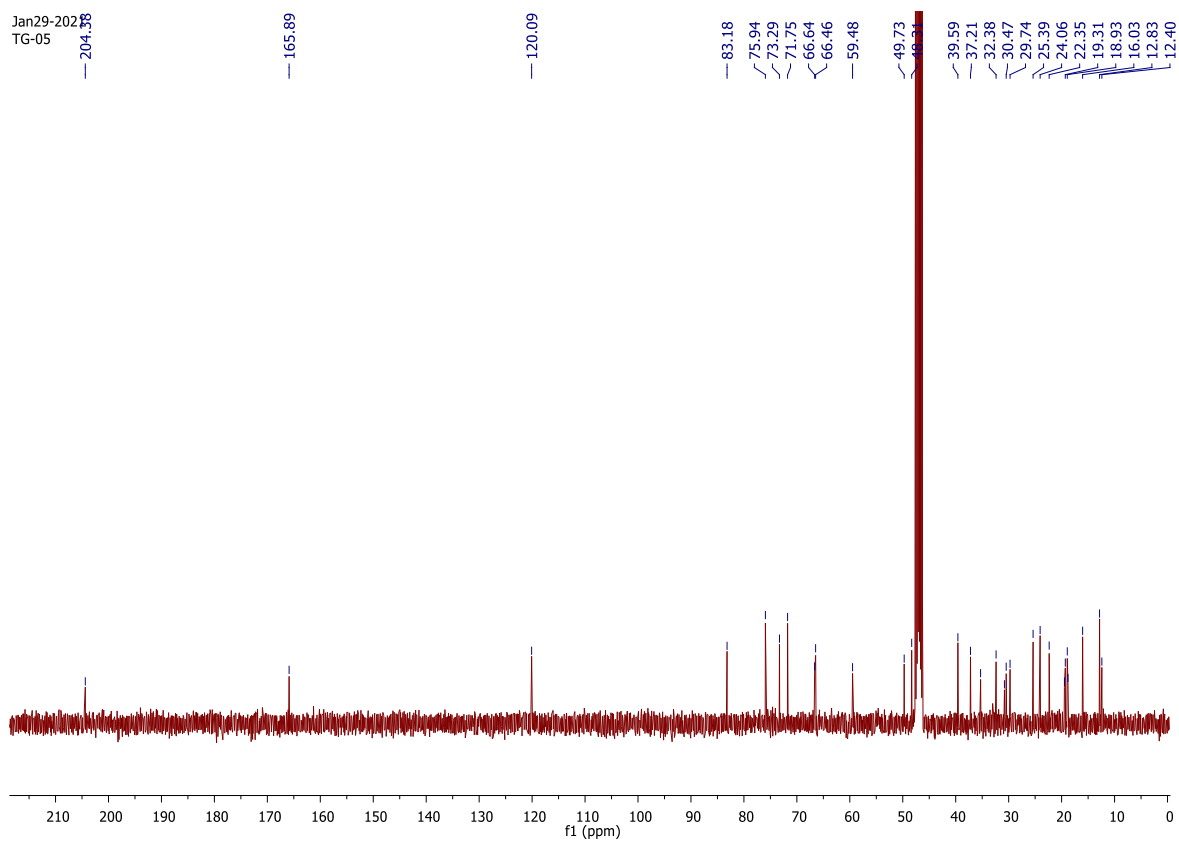

**Figure S32.**  $^{13}\text{C}$  NMR spectrum of compound **9** ( $\text{CD}_3\text{OD}$ , 100 MHz)

**Table 1:** Growth inhibitory effect of Extracts and enriched fractions against different cancer cell lines

| Extract & Fractions | Conc. (µg/mL) | Human cancer cell lines |            |         |              |              |            |           |
|---------------------|---------------|-------------------------|------------|---------|--------------|--------------|------------|-----------|
|                     |               | Breast                  | Breast     | Colon   | Colon        | Lung         | Pancreatic | Prostate  |
|                     |               | MCF-7                   | MDA-MB-231 | HCT-116 | SW-620       | A-549        | MIA PaCa-2 | PC-3      |
|                     |               | Growth Inhibition (%)   |            |         |              |              |            |           |
| <b>TG-E1</b>        | <b>100</b>    | 16.88                   | 28.55      | 11.83   | 10.97        | 12.49        | <b>ND</b>  | <b>ND</b> |
|                     | <b>50</b>     | 5.24                    | 11.87      | 8.39    | 3.22         | 4.56         | <b>ND</b>  | <b>ND</b> |
| <b>TG-E3</b>        | <b>100</b>    | 48.22                   | 40.28      | 72.91   | <b>72.50</b> | <b>66.46</b> | 30.87      | 67.75     |
|                     | <b>50</b>     | 23.07                   | 18.76      | 50.73   | 58.87        | 35.07        | 15.74      | 52.26     |
| <b>TG-EF</b>        | <b>100</b>    | 60.22                   | 58.22      | 86.66   | <b>91.29</b> | <b>96.30</b> | 68.87      | 85.99     |
|                     | <b>50</b>     | 45.40                   | 34.78      | 76.77   | 75.39        | 82.78        | 42.48      | 66.55     |

**Table 2:** SRB assay-based screening results. \*\*IC<sub>50</sub> values (μM) of compounds on panel of different human cancer cell lines and normal cell line.

| IC <sub>50</sub> (μM)± SD |                    |                |                 |                       |                |                |                    |                   |                |                |
|---------------------------|--------------------|----------------|-----------------|-----------------------|----------------|----------------|--------------------|-------------------|----------------|----------------|
| Com<br>pd                 | A-<br>549          | HCT-<br>116    | MCF-<br>7       | MD<br>A-<br>MB<br>231 | Mia<br>PaCa-2  | SW-<br>620     | PC-3               | SHS<br>Y-5Y       | HOP-<br>62     | fR2            |
| 1                         | 1.83±<br>0.54      | 2.91±<br>0.50  | 4.40±<br>0.33   | 1.90±<br>0.26         | 1.94±<br>0.24  | 1.85±<br>0.52  | 3.18<br>±<br>0.37  | 2.43<br>±<br>0.32 | 1.92±<br>0.62  | 13.75<br>±0.42 |
| 2                         | 1.79±<br>0.47      | 3.47±<br>0.39  | 5.92±<br>0.55   | 9.49±<br>0.25         | -              | 3.18±<br>0.40  | 4.97<br>±<br>0.58  | -                 | -              | 10.84<br>±0.35 |
| 3                         | >50                | >50            | >50             | >50                   | >50            | >50            | >50                | >50               | >50            | >50            |
| 4                         | 2.08±<br>0.56      | 1.95±<br>0.45  | 6.98±<br>0.39   | 8.29±<br>0.33         | 3.79±<br>0.49  | 1.98±<br>0.46  | 3.77<br>±<br>0.52  | 3.33<br>±<br>0.26 | 2.65±<br>0.47  | -              |
| 5                         | 1.50±<br>0.62      | 4.44±<br>0.57  | 4.15±<br>0.47   | 2.56±<br>0.33         | 1.69 ±<br>0.45 | 1.66±<br>0.38  | 1.85<br>±<br>0.43  | 4.43<br>±<br>0.44 | 1.85±<br>0.57  | 2.71±<br>0.23  |
| 6                         | >50                | >50            | >50             | >50                   | >50            | >50            | >50                | >50               | >50            | -              |
| 7                         | 30.46<br>±<br>0.49 | >50            | 29.40<br>± 0.37 | >50                   | >50            | >50            | >50                | >50               | >50            | -              |
| 8                         | >50                | >50            | >50             | >50                   | >50            | >50            | >50                | >50               | >50            | -              |
| 9                         | 32.95<br>±<br>0.43 | >50            | 38.99<br>± 0.63 | >50                   | 33.26±<br>0.57 | >50            | >50                | >50               | >50            | -              |
| <b>CPT</b>                | 0.030<br>±0.04     | 0.160±<br>0.23 | 0.147<br>±0.13  | 0.125<br>±0.03        | 0.060±<br>0.02 | 0.093<br>±0.03 | 0.17<br>0±0.<br>03 | -                 | 0.065<br>±0.04 | -              |

## References

1. Sofi, I.I., Verma, S., Charles, B., Ganie, A. H., Sharma, N., & Shah, M. A. 2022. Predicting distribution and range dynamics of *Trillium govanianum* under climate change and growing human footprint for targeted conservation. *Plant Ecology*. 223, 1-17. <https://doi.org/10.1007/s11258-021-01189-3>

2. Ohara, M., Kawano, S., 2005. Life-history monographs of Japanese plants. 2: *Trillium camschatcense* Ker-Gawl (Trilliaceae). Plant Species Biol. 20, 75–82. <https://doi.org/10.1111/j.1442-1984.2005.00126.x>.
3. Chauhan, H.K., Bisht, A.K., Bhatt, I.D., Bhatt, A., Gallacher, D., 2019. *Trillium*-toward sustainable utilization of a biologically distinct genus valued for traditional medicine, Bot. Rev. 85, 252–272. <https://doi.org/10.1007/s12229-019-09211-0>
4. Sharma, P., Samant, S., 2104. Diversity distribution and indigenous uses of medicinal plants in Parbati valley of Kullu district in Himachal Pradesh, North-western Himalaya, Asian. J. Adv. Basic Sci. 2, 77–98. <https://www.jmbm.in/index.php/jmbas/article/view/6>
5. Pant, S., Samant, S.S., 2010. Ethnobotanical observations in the Mornaula reserve forest of Komoun, West Himalaya, India. Ethnobot. Leaflet. 2010,8. <https://opensiuc.lib.siu.edu/ebl/vol2010/iss2/8>
6. Rani, S., Rana, J.C., & Rana, P.K., 2013. Ethnomedicinal plants of Chamba district, Himachal Pradesh, India. J. Med. Plant Res. 7, 3147-3157. [DOI:10.5897/JMPR2013.5249](https://doi.org/10.5897/JMPR2013.5249)
7. Sharma, O.R., Arya, D., Goel, S., Vyas, K., Shinde, P., 2018. *Trillium govaniianum* Wall. ex D. Don (Nagchatri): an important ethnomedicinal plant of Himalayan region (Himachal Pradesh). J. Med. Plants Stud. 6, 11-13. [ISSN \(E\): 2320-3862](https://doi.org/10.2320/3862)
8. Ono, M., Hamada, T., Nohara, T., 1986. An 18-norspirostanol glycoside from *Trillium tschonoskii*. Phytochemistry, 25, 544-545. [https://doi.org/10.1016/S0031-9422\(00\)85524-7](https://doi.org/10.1016/S0031-9422(00)85524-7)
9. Mimaki, Y., Watanabe, K., 2008. Clintoniosides A–C, new polyhydroxylated spirostanol glycosides from the rhizomes of *Clintonia udensis*. Helv. Chim. Acta. 91, 2097-2106. <https://doi.org/10.1002/hlca.200890224>
10. Huang, W., & Zou, K., 2011. Cytotoxicity of a plant steroidal saponin on human lung cancer cells. Asian Pac. J. Cancer Prev, 12(2), 513-517.
11. Ur Rahman, S., Ismail, M., Khurram, M., Ullah, I., Rabbi, F., Iriti, M., 2017. Bioactive steroids and saponins of the genus *Trillium*. Molecules. 22, 2156. <https://doi.org/10.3390/molecules22122156>
12. Yan, T., Wang, A., Hu, G., Jia, J., 2021. Chemical constituents of *Trillium tschonoskii* Maxim. Nat. Prod. Res. 35, 3351-3359. <https://doi.org/10.1080/14786419.2019.1700245>
13. Yan, L.L., Zhang, Y.J., Gao, W.Y., Man, S.L., Wang, Y., 2009. In vitro and in vivo anticancer activity of steroid saponins of *Paris polyphylla* var. *yunnanensis*. Exp. Oncol. 27-32. <http://dSPACE.nbu.gov.ua/handle/123456789/135101>

14. Ya-Zheng, Z.H.A.O., Yuan-Yuan Zhang, H.A.N., Han, F.A.N., Rui-Ping, H.U., Yang, Liang Zhong, K.O.U., Jun-Ping, K.O.U., Bo-Yang, Y.U., 2018. Advances in the antitumor activities and mechanisms of action of steroidal saponins. *Chin. J. Nat. Med.* 16, 732-748. [https://doi.org/10.1016/S1875-5364\(18\)30113-4](https://doi.org/10.1016/S1875-5364(18)30113-4).
15. Ur Rahman, S., Adhikari, A., Ismail, M., Raza Shah, M., Khurram, M., Shahid, M., Ali, F., Haseeb, A., Akbar, F., Iriti, M., 2016. Beneficial effects of *Trillium govanianum* rhizomes in pain and inflammation. *Molecules.* 21, 1095. <https://doi.org/10.3390/molecules21081095>
16. Ismail, M., Shah, M.R., Adhikari, A., Anis, I., Ahmad, M.S., Khurram, M., 2015. Govanoside A, a new steroidal saponin from rhizomes of *Trillium govanianum*. *Steroids*, 104, 270-275. <https://doi.org/10.1016/j.steroids.2015.10.013>
17. Singh, P.P., Suresh, P.S., Bora, P.S., Bhatt, V., Sharma, U., 2021. Govanoside B, a new steroidal saponin from rhizomes of *Trillium govanianum*. *Nat. Prod. Res.* 36, 37-45. <https://doi.org/10.1080/14786419.2020.1761360>
18. Abdel-Sattar, E., Shabana, M.M., El-Mekkawy, S., 2008. Protodioscin and pseudoprotodioscin from *Solanum intrusum*. *Res. J. Phytochem.* 2, 100-105.
19. Yokosuka, A., Mimaki, Y., 2008. Steroidal glycosides from the underground parts of *Trillium erectum* and their cytotoxic activity. *Phytochem.* 69, 2724-2730. <https://doi.org/10.1016/j.phytochem.2008.08.004>
20. Love, J., Simons, C.R., 2020. Acid hydrolysis of saponins extracted in tincture. *PloS one* 15, e0244654. <https://doi.org/10.1371/journal.pone.0244654>
21. Desai, A.G., Qazi, G.N., Ganju, R.K., El-Tamer, M., Singh, J., Saxena, A.K., Bedi, Y.S., Taneja, S.C., Bhat, H.K., 2008. Medicinal plants and cancer chemoprevention. *Curr. Drug Metab.* 9, 581-591. <https://doi.org/10.2174/138920008785821657>
22. Vichai, V., Kirtikara, K., 2006. Sulforhodamine B colorimetric assay for cytotoxicity screening. *Nat. Protoc.* 1, 1112-1116. <https://doi.org/10.1038/nprot.2006.179>
23. Gupta, N., Rath, S.K., Singh, J., Qayum, A., Singh, S., Sangwan, P.L., 2017. Synthesis of novel benzylidene analogues of betulinic acid as potent cytotoxic agents. *Eur. J. Med. Chem.* 135, 517-530. <https://doi.org/10.1016/j.ejmech.2017.04.062>
24. Gupta, N., Sharma, S., Raina, A., Bhushan, S., Malik, F.A., Sangwan, P.L., 2017. Synthesis of Novel Mannich Derivatives of Bakuchiol as Apoptotic Inducer through Caspase Activation and PARP-1 Cleavage in A549 Cells. *ChemistrySelect.* 2, 5196-5201. <https://doi.org/10.1002/slct.201700504>

25. Perillo, B., Di Donato, M., Pezone, A., Di Zazzo, E., Giovannelli, P., Galasso, G., Castoria, G. Migliaccio, A., 2020. ROS in cancer therapy: The bright side of the moon. *Exp. Mol. Med.* 52, 192-203. <https://doi.org/10.1038/s12276-020-0384-2>
26. Ju, Y., Jia, Z.J., 1992. Steroidal saponins from the rhizomes of *Smilax menispermoides*. *Phytochem.* 31, 1349-1351. [https://doi.org/10.1016/0031-9422\(92\)80288-P](https://doi.org/10.1016/0031-9422(92)80288-P)
27. Mimaki, Y., Aoki, T., Jitsuno, M., Kiliç, C.S., Coşkun, M., 2008. Steroidal glycosides from the rhizomes of *Ruscus hypophyllum*. *Phytochem.* 69, 729-737. <https://doi.org/10.1016/j.phytochem.2007.09.022>
28. Braca, A., Prieto, J.M., De Tommasi, N., Tomè, F., Morelli, I., 2004. Furostanol saponins and quercetin glycosides from the leaves of *Helleborus viridis* L. *Phytochem.* 65, 2921-2928. <https://doi.org/10.1016/j.phytochem.2004.07.013>
29. Elmore, S., 2007 Apoptosis: a review of programmed cell death. *Toxicol. Pathol.* 35, 495-516. <https://doi.org/10.1080/01926230701320337>
30. Biancardi, A., Biver, T., Secco, F., Mennucci, B., 2013. An investigation of the photophysical properties of minor groove bound and intercalated DAPI through quantum-mechanical and spectroscopic tools. *Phys. Chem. Chem. Phys.* 15, 4596-4603. <https://doi.org/10.1039/C3CP44058C>
31. Pathania, A.S., Wani, Z.A., Guru, S.K., Kumar, S., Bhushan, S., Korkaya, H., Seals, D.F., Kumar, A., Mondhe, D.M., Ahmed, Z., Chandan, B.K., Malik, F., 2015. The anti-angiogenic and cytotoxic effects of the boswellic acid analog BA145 are potentiated by autophagy inhibitors. *Mol. Cancer.* 14, 1-15. <https://doi.org/10.1186/1476-4598-14-6>
32. Perillo, B., Di Donato, M., Pezone, A., DiZazzo, E., Giovannelli, P., Galasso, G., 2020. ROS in cancer therapy: The bright side of the moon, *Exp. Mol. Med.* 52, 192-203. <https://doi.org/10.1038/s12276-020-0384-2>
33. Gottlieb, E., Armour, S.M., Harris, M.H., Thompson, C.B., 2003. Mitochondrial membrane potential regulates matrix configuration and cytochrome c release during apoptosis. *Cell Death Differ.* 10, 709-717. <https://doi.org/10.1038/sj.cdd.4401231>
34. Kumar, A., Singh, B., Sharma, P.R., Bharate, S.B., Saxena, A.K., Mondhe, D.M., 2016. A novel microtubule depolymerizing colchicine analogue triggers apoptosis and autophagy in HCT-116 colon cancer cells. *Cell Biochem. Funct.* 34, 69-81. <https://doi.org/10.1002/cbf.3166>



35. Rodriguez, L.G., Wu, X., Guan, J.L., 2005. Wound-healing assay. *Cell Migration: Developmental Methods and Protocols*, vol 294. Humana Press. 23-29. <https://doi.org/10.1385/1-59259-860-9:023>
36. Munshi, A., Hobbs, M., Meyn, R.E., 2005. Clonogenic cell survival assay. In: Blumenthal, R.D. (eds) *Chemosensitivity: Methods in Molecular Medicine*, vol 110. Humana Press. 21-28. <https://doi.org/10.1385/1-59259-869-2:021>
37. Majeed, R., Hamid, A., Sangwan, P.L., Chinthakindi, P.K., Koul, S., Rayees, S., Singh, G., Mondhe, D.M., Mintoo, M.J., Singh, S.K., Rath, S.K., Saxena, A.K., 2014. Inhibition of phosphatidylinositol-3 kinase pathway by a novel naphthol derivative of betulinic acid induces cell cycle arrest and apoptosis in cancer cells of different origin. *Cell Death Dis.* 5, e1459-e1459. <https://doi.org/10.1038/cddis.2014.387>
